# Supplementary material for: Total synthesis of Sparstolonin B, a potent anti-inflammatory agent
Source: Royal Society of Chemistry journal article supplement (doi:10.1039/c4ra15948a), 2015-01-01

## Total synthesis of Sparstolonin B, a potent anti-inflammatory agent

Yongqiang Wang,<sup>a,b</sup> Chao Wang,<sup>\*a</sup> Yuanxun Wang,<sup>a</sup> Lijin Dong,<sup>a</sup> and Jian Sun<sup>\*a</sup>

<sup>†</sup> Chengdu Institute of Biology, Chinese Academy of Sciences, Chengdu 610041, China

<sup>‡</sup> University of Chinese Academy of Sciences, Beijing 100049, China.

E-mail: [sunjian@cib.ac.cn](mailto:sunjian@cib.ac.cn); [wangchao@cib.ac.cn](mailto:wangchao@cib.ac.cn)

### Supporting Information

#### Contents

|                                           |       |
|-------------------------------------------|-------|
| General information                       | 1     |
| Experimental procedures of the strategy 1 | 2-5   |
| Experimental procedures of the strategy 2 | 5-11  |
| Reference                                 | 12    |
| NMR spectra                               | 13-26 |

#### General information

All reactions involving air- and moisture-sensitive reagents were carried out using oven dried glassware and standard syringe-septum cap techniques. TLC inspections were on silica gel GF254 plates. Column chromatography was performed on silica gel (200–300 mesh). All chemicals were purchased from commercial suppliers and used as received.

All solvents and reagents were used as supplied with following exceptions. Tetrahydrofuran (THF), toluene, mesitylene and diethyl ether were freshly distilled from Na metal/benzophenone under argon. N,N-Dimethylformamide (DMF), dimethyl sulfoxide (DMSO), CH<sub>2</sub>Cl<sub>2</sub>, MeCN, pyridine, N,N-Diisopropylamine (i-Pr<sub>2</sub>NH) and triethylamine (Et<sub>3</sub>N) were distilled from calcium hydride under argon. Acetone was distilled from phosphorus pentoxide under argon.

Melting points were taken on X-4 micro melting point apparatus and were uncorrected. <sup>1</sup>H and <sup>13</sup>C NMR spectra were obtained on a Bruker Avance 400 (400 MHz), and tetramethylsilane (TMS) was used as internal standard. Data for <sup>1</sup>H were reported as follows: chemical shift (ppm), and multiplicity (S = singlet, d = doublet, t = triplet, q = quartet, m = multiplet). Data for <sup>1</sup>H NMR and <sup>13</sup>C NMR were all reported as ppm. Coupling constants were reported in Hertz (Hz). All high resolution mass spectra were obtained on a micro TOF-QII 10203 spectrometer.

## Experimental procedures of the strategy 1

### 4-(2,5-dimethoxyphenyl)-2-methylbut-3-yn-2-ol (**2**).

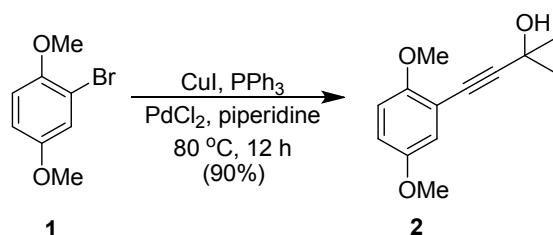

A mixture of **1** (2.17 g, 10 mmol),  $\text{PdCl}_2$  (35.5 mg, 0.2 mmol),  $\text{CuI}$  (19.1 mg, 0.1 mmol),  $\text{PPh}_3$  (78.7 mg, 0.3 mmol), 3-Methyl butynol (2.91 mL, 30 mmol) and piperidine (40 mL) in a 50 mL of sealed tube was heated at  $80^\circ\text{C}$  for 12 h under nitrogen atmosphere. The reaction was monitored for completion by TLC. Upon completion, the reaction mixture was cooled to room temperature, piperidine was removed under reduced pressure and the reaction mixture was partitioned between EtOAc ( $2 \times 100$  mL) and water ( $2 \times 50$  mL). The organic layer was separated, and the aqueous layer was extracted with EtOAc ( $2 \times 100$  mL). The combined organic fractions were washed with 3% aqueous HCl (100 mL), dried over anhydrous  $\text{Na}_2\text{SO}_4$  and concentrated under reduced pressure. The crude residue was purified by flash chromatography over silica gel (PE/EtOAc = 5/1) to yield the product **2** as a yellow oil (1.96 g, 90%). Spectroscopic data matched that previously reported.<sup>1</sup>  $^1\text{H}$  NMR (400 MHz,  $\text{CDCl}_3$ )  $\delta$  6.95 (d,  $J = 2.9$  Hz, 1H), 6.88 – 6.83 (m, 1H), 6.81 (d,  $J = 9.0$  Hz, 1H), 3.85 (s, 3H), 3.78 (s, 3H), 1.66 (s, 6H).  $^{13}\text{C}$  NMR (101 MHz,  $\text{CDCl}_3$ )  $\delta$  154.4, 153.2, 118.2, 115.7, 112.5, 112.2, 98.1, 78.3, 65.6, 56.5, 55.8, 31.5. HRMS (ESI, TOF) ( $m/z$ ): calcd for  $\text{C}_{16}\text{H}_{16}\text{O}_3$ ,  $[\text{M} + \text{Na}]^+$  243.0997, found: 243.0990.

### 1,4-bis(2,5-dimethoxyphenyl)buta-1,3-diyne(**15**)

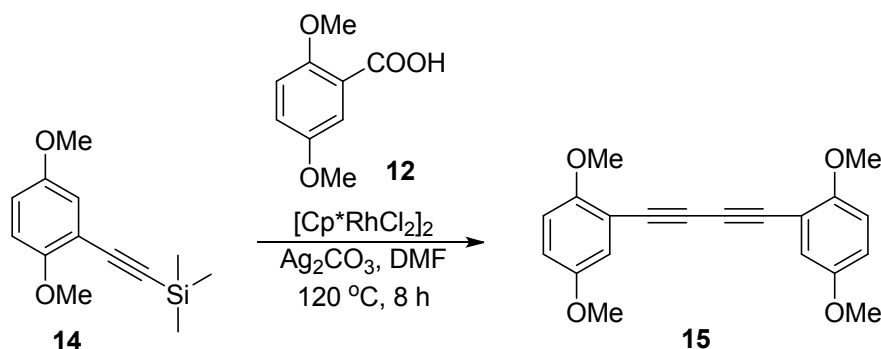

A mixture of **12** (36 mg, 0.2 mmol), **14** (52 mg, 0.22 mmol),  $[\text{Cp}^*\text{RhCl}_2]_2$  (1.24 mg, 0.002 mmol)  $\text{Ag}_2\text{CO}_3$  (61 mg, 0.22 mmol) and DMF (2 mL) in a 25 mL of sealed tube was heated at  $120^\circ\text{C}$  for 8 h under nitrogen atmosphere. The reaction was monitored for completion by TLC. Upon completion, the reaction mixture was cooled to room temperature and was partitioned between EtOAc (20 mL) and water (15 mL). The organic layer was separated, and the aqueous layer was extracted with EtOAc ( $2 \times 10$  mL). The combined organic fractions were washed with brine (10 mL), dried

over anhydrous  $\text{Na}_2\text{SO}_4$  and concentrated under reduced pressure. The crude residue was purified by flash chromatography over silica gel (PE/EtOAc = 5/1) to yield the product **15** as a yellow oil (28 mg, 78 %). Spectroscopic data matched that previously reported.<sup>2</sup>  $^1\text{H}$  NMR (400 MHz,  $\text{CDCl}_3$ )  $\delta$  7.04 (d,  $J$  = 3.1 Hz, 1H), 6.93 – 6.88 (m, 1H), 6.83 (d,  $J$  = 9.1 Hz, 1H), 3.88 (s, 3H), 3.79 (s, 3H).

**4-(2,5-dimethoxyphenyl)-3-(2-hydroxypropan-2-yl)-5,8-dimethoxy-1H-isochromen-1-one (3).**

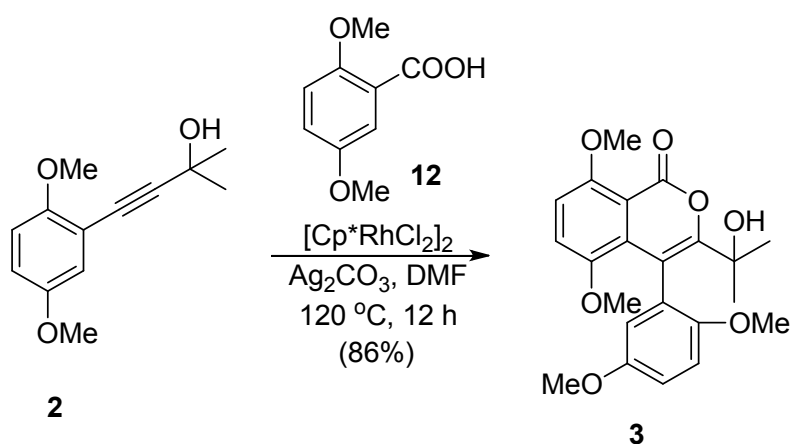

A mixture of **12** (0.91 g, 5.0 mmol), **2** (1.32 g, 6.0 mmol),  $[\text{Cp}^*\text{RhCl}_2]_2$  (31.0 mg, 0.05 mmol),  $\text{Ag}_2\text{CO}_3$  (1.53 g, 5.5 mmol) and DMF (40 mL) in a 50 mL of sealed tube was heated at 120  $^\circ\text{C}$  for 12 h under nitrogen atmosphere. The reaction was monitored for completion by TLC. Upon completion, the reaction mixture was cooled to room temperature and was partitioned between EtOAc (2  $\times$  100 mL), water (2  $\times$  80 mL). The organic layer was separated, and the aqueous layer was extracted with EtOAc (2  $\times$  100 mL). The combined organic fractions were washed with brine (10 mL), dried over anhydrous  $\text{Na}_2\text{SO}_4$  and concentrated under reduced pressure. The crude residue was purified by flash chromatography over silica gel (PE/EtOAc = 2/1) to yield the product **3** as a yellow solid (1.76 g, 86 %), mp 114  $^\circ\text{C}$ .  $^1\text{H}$  NMR (400 MHz,  $\text{CDCl}_3$ )  $\delta$  7.10 (d,  $J$  = 9.1 Hz, 1H), 6.94 (d,  $J$  = 9.0 Hz, 1H), 6.84 (dd,  $J$  = 10.6, 5.7 Hz, 2H), 6.70 (d,  $J$  = 2.5 Hz, 1H), 3.99 (s, 3H), 3.78 (s, 3H), 3.77 (s, 3H), 3.23 (s, 3H), 2.35 (s, 1H), 1.47 (s, 3H), 1.40 (s, 3H).  $^{13}\text{C}$  NMR (101 MHz,  $\text{CDCl}_3$ )  $\delta$  158.7, 158.1, 156.8, 156.0, 153.0, 152.5, 149.7, 130.9, 127.9, 121.0, 116.9, 112.8, 110.9, 110.5, 108.4, 73.7, 57.4, 56.8, 56.0, 55.8, 29.4. HRMS calcd for  $\text{C}_{22}\text{H}_{24}\text{O}_7$ ,  $[\text{M} + \text{Na}]^+$  423.1420; Found: 423.1431.

**4-(2,5-dihydroxyphenyl)-5,8-dihydroxy-1H-isochromen-1-one (5).**

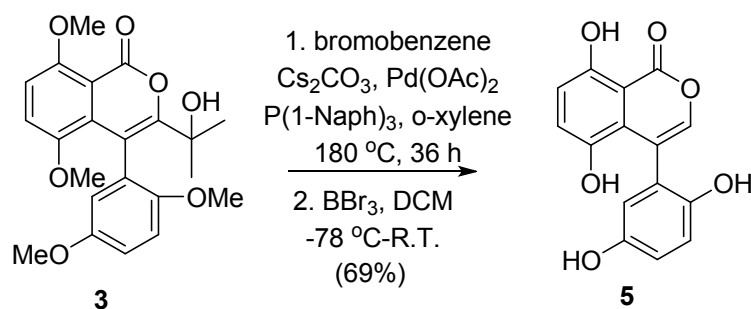

A mixture of **3** (200 mg, 0.5 mmol),  $\text{Pd}(\text{OAc})_2$  (11.2 mg, 0.05 mmol),  $\text{Cs}_2\text{CO}_3$  (0.1 mmol,

32.6 mg), P(1-Naph)<sub>3</sub> (0.1 mmol, 41.3 mg), bromobenzene (0.1 mmol, 15.7 mg) and o-xylene (5 mL) in a 25 mL of sealed tube was heated at 180 °C for 36 h under nitrogen atmosphere. After completed, the reaction mixture was cooled to room temperature and was partitioned between EtOAc (2 × 50 mL) and water (2 × 20 mL). The organic layer was separated, and the aqueous layer was extracted with EtOAc (2 × 30 mL). The combined organic fractions were washed with brine (50 mL), dried over anhydrous Na<sub>2</sub>SO<sub>4</sub> and concentrated under reduced pressure. The crude residue was purified by flash chromatography over silica gel (PE/EtOAc = 2/1) to yield the product directly used as the material of the next step. The product obtained (137 mg, 0.4 mmol) was dissolved in 5 mL of DCM in flask and cooled to -78°C under argon atmosphere, BBr<sub>3</sub> (1.2 mL, 2.4 mmol, diluted with DCM, V<sub>BBr<sub>3</sub></sub>/V<sub>DCM</sub>=1/4) was dropwised slowly via a syringe. The reaction mixture was kept stirring for 3 h at -78 °C and then raised to room temperature until completed. The reaction mixture was quenched with water (40 mL) and the aqueous layer was extracted with EtOAc (2 × 50 mL). The combined organic fractions were washed with brine (30 mL), dried over anhydrous Na<sub>2</sub>SO<sub>4</sub> and concentrated under reduced pressure. The crude residue was purified by flash chromatography over silica gel (PE/EtOAc = 2/1) to yield the product as a yellow solid (0.10 g, 69% yield for two steps), mp 272 °C. <sup>1</sup>H NMR (400 MHz, DMSO) δ 10.89 (s, 1H), 9.08 (s, 1H), 8.66 (s, 1H), 8.42 (s, 1H), 7.17 (s, 1H), 7.08 (d, *J* = 8.9 Hz, 1H), 6.91 (d, *J* = 8.9 Hz, 1H), 6.68 – 6.48 (m, 3H). <sup>13</sup>C NMR (101 MHz, DMSO) δ 166.6, 154.1, 149.4, 149.0, 146.3, 141.5, 125.5, 124.4, 123.0, 117.6, 117.4, 116.2, 115.3, 115.2, 106.5. HRMS calcd for C<sub>15</sub>H<sub>10</sub>O<sub>6</sub>, [M + Na]<sup>+</sup> 309.0375; Found: 309.0374.

**4,10-dihydroxy-3a1,6a-dihydro-3H-pyrano[3,4,5-kl]xanthen-3-one (SsnB).**

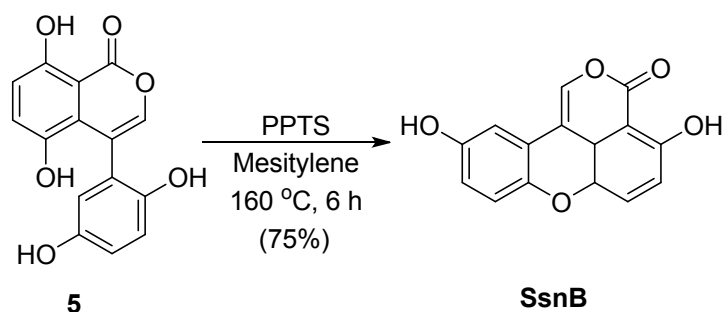

The isocoumarin **5** (57.3 mg, 0.2 mmol) and Pyridinium toluene-4-sulphonate (50.0 mg, 2.0 mmol) were dissolved in 10 mL of mesitylene in flask under oxygen atmosphere, kept the reaction mixture stirring for 2.5 h at 160 °C. After completed, the mixture was cooled to room temperature, quenched with 1 N hydrochloric acid (10 mL) and diluted with DCM (150 mL). The organic layer was washed with brine (2 × 50 mL), water (30 mL), and dried over Mg<sub>2</sub>SO<sub>4</sub>. After evaporation of the solvent under vacuum, the crude residue was purified by flash chromatography over silica gel (PE/EtOAc = 2/1) to yield the product as a yellow solid, (40.6 mg, 75%). <sup>1</sup>H NMR (400 MHz, DMSO) δ 10.36 (s, 1H), 9.53 (s, 1H), 7.97 (s, 1H), 7.47 (d, *J* = 9.0 Hz, 1H), 7.09 (d, *J* = 2.7 Hz, 1H), 7.06 (d, *J* = 9.0 Hz, 1H), 7.02 (d, *J* = 8.9 Hz, 1H), 6.82 (dd, *J* = 8.9, 2.7 Hz, 1H). <sup>13</sup>C NMR (101 MHz, DMSO) δ 164.3, 155.4, 154.2, 143.1, 140.9, 135.3, 123.9, 120.2, 118.6, 118.5, 117.6, 115.0, 109.9, 108.0, 105.0.

## Experimental procedures the strategy 2

**Bis(4-methoxy-3-(methoxycarbonyl)phenyl)iodonium trifluoromethanesulfonate salt (6).**

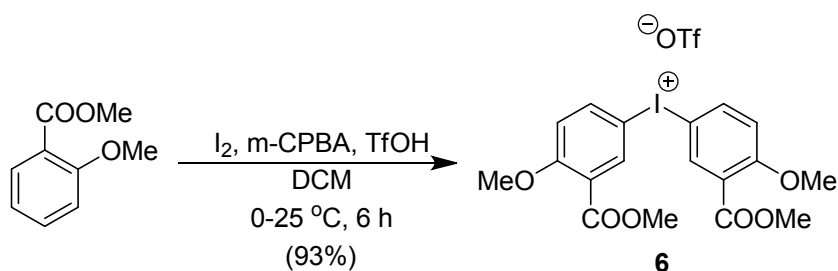

The similar procedure of Berit Olofsson's work<sup>3</sup> was followed. Iodine (2.54 g, 10.0 mmol) was added into 100 mL of DCM in one portion, stirred at room temperature until the iodine was dissolved, m-CPBA (6.36 g, 30.0 mmol) was added and the purple solution was stirred for 10 minutes. The reaction mixture was cooled to 0 °C and then methyl 2-methoxybenzoate (3.32 g, 20.0 mmol) was added in one portion, kept stirring for an additional 10 minutes. Trifluoromethanesulfonic acid (TfOH, 3.52 mL, 40.0 mmol) was slowly added via a funnel. The reaction mixture was kept stirring for 3 h and then raised to room temperature slowly, stirring for additional 3 h at room temperature before the reaction completed. Transferred the reaction mixture to a separatory funnel, diluted with DCM (300 mL), washed with H<sub>2</sub>O (2 × 100 mL). The organic layers were concentrated in vacuo and the crude product was obtained. Diethyl ether (100 mL) was added to the crude product, stirred at 0 °C for 20 minutes causing precipitation of the product. The solid was collected by suction filtration and washed with diethyl ether (3 × 80 mL) obtained pure product **6** as white solid (12.6 g, 92%), mp 96 °C. <sup>1</sup>H NMR (400 MHz, DMSO) δ 8.53 (d, *J* = 2.0 Hz, 2H), 8.42 (dd, *J* = 9.0, 1.9 Hz, 2H), 7.32 (d, *J* = 9.1 Hz, 2H), 3.88 (s, 6H), 3.83 (s, 6H). <sup>13</sup>C NMR (101 MHz, DMSO) δ 165.0, 160.9, 140.8, 137.9, 123.1, 116.5, 106.0, 57.0, 53.0 (s).

**Methyl-5-(2-bromo-4-methoxyphenoxy)-2-methoxybenzoate (8).**

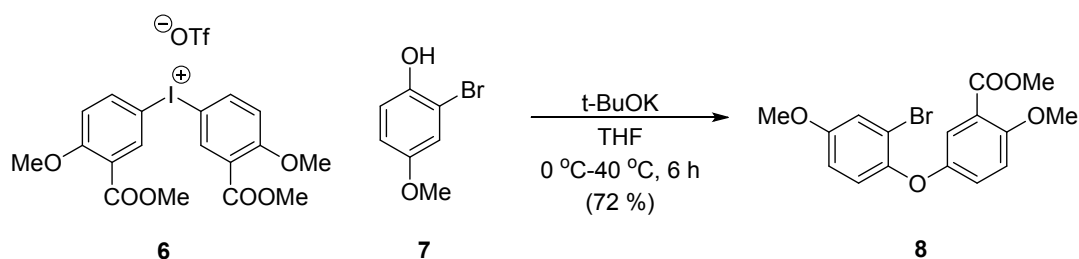

The similar procedure of Berit Olofsson's work<sup>4</sup> was followed. The 2-bromo-4-methoxyphenol **7** (1.00 g, 5.0 mmol) was added to a suspension of t-BuOK (0.67 g, 6.0 mmol) in THF (40 mL) at 0 °C and the reaction mixture was stirred for 15 minutes. Diaryliodonium salt **6** (3.64 g, 6.0 mmol) was added in one portion and the reaction

was stirred at 40 °C until TLC indicated complete consumption of phenol. The solvent of THF was removed in vacuo, and the residue mixture was diluted with EtOAc (200 mL), washed with H<sub>2</sub>O (2 × 80 mL). The aqueous layer was extracted with EtOAc (100 mL). Combined the organic phases, dried over Na<sub>2</sub>SO<sub>4</sub> and concentrated in vacuo. The crude material was purified by flash chromatography over silica gel (PE/EtOAc = 5/1) to yield the product as a yellow solid (1.0 g, 72%), mp 72 °C. <sup>1</sup>H NMR (400 MHz, CDCl<sub>3</sub>) δ 7.38 (d, *J* = 3.1 Hz, 1H), 7.18 (d, *J* = 2.9 Hz, 1H), 7.07 (dd, *J* = 9.0, 3.1 Hz, 1H), 6.94 (dd, *J* = 9.0, 6.2 Hz, 2H), 6.84 (dd, *J* = 8.9, 2.9 Hz, 1H), 3.90 (s, 3H), 3.88 (s, 3H), 3.82 (s, 3H). <sup>13</sup>C NMR (101 MHz, CDCl<sub>3</sub>) δ 166.1, 156.4, 154.9, 150.7, 147.2, 122.4, 121.6, 120.8, 120.3, 118.6, 115.4, 114.6, 113.5, 56.6, 55.9, 52.2. HRMS calcd for C<sub>16</sub>H<sub>15</sub>BrO<sub>5</sub>, [M + Na]<sup>+</sup> 389.0001; Found: 388.9990.

**5-(2-(3-hydroxy-3-methylbut-1-yn-1-yl)-4-methoxyphenoxy)-2-methoxybenzoic acid (10).**

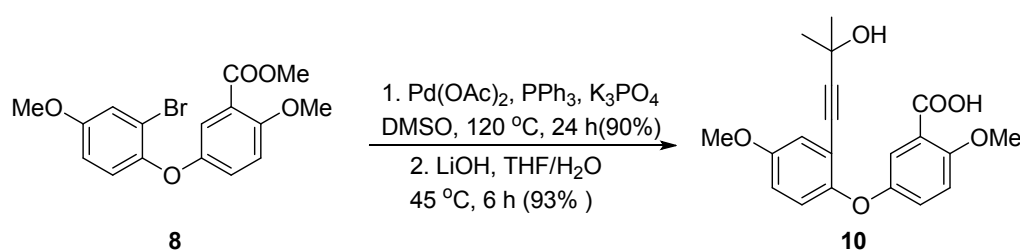

A mixture of **8** (0.92 g, 2.5 mmol), Pd(OAc)<sub>2</sub> (5.6 mg, 0.025 mmol), PPh<sub>3</sub> (13.1mg, 0.05 mmol), K<sub>3</sub>PO<sub>4</sub> (1.59 g, 7.5 mmol), 3-Methyl butynol (0.61 mL, 6.3 mmol) and DMSO (30 mL) in a 50 mL of sealed tube was heated at 120 °C for 24 h under nitrogen atmosphere. The reaction was monitored for completion by TLC. Upon completion, the reaction mixture was cooled to room temperature and the reaction mixture was partitioned between DCM (2 × 150 mL) and water (2 × 100 mL). The organic layer was separated, and the aqueous layer was extracted with DCM (100 mL). The combined organic fractions were washed with brine (100 mL), dried over anhydrous Na<sub>2</sub>SO<sub>4</sub> and concentrated under reduced pressure. The crude residue was purified by flash chromatography over silica gel (PE/EtOAc = 2/1) to yield the product directly used for the next step.

The product obtained (0.74 g, 2 mmol) was dissolved in THF (30 mL), and aqueous LiOH (0.24 g, 10 mmol, dissolved in 15 mL of H<sub>2</sub>O) was added in one portion. The reaction mixture was kept stirring at 45 °C for 6 h until completed. THF was removed under reduced pressure. The residue mixture was diluted with H<sub>2</sub>O (100 mL), neutralized with 3 N HCl until PH < 3. The aqueous layer was extracted with DCM (3 × 100 mL). The combined organic fractions were washed with brine (100 mL), dried over anhydrous Na<sub>2</sub>SO<sub>4</sub> and concentrated under reduced pressure. Flash chromatography of the residue on silica gel column (PE/EtOAc = 1/1) afforded the target product **10** as yellow oil (0.75 g, 84% yield for two steps). <sup>1</sup>H NMR (400 MHz, CDCl<sub>3</sub>) δ 7.68 (d, *J* = 3.0 Hz, 1H), 7.19 (dd, *J* = 9.0, 3.1 Hz, 1H), 7.02 (d, *J* = 9.0 Hz, 1H), 6.97 (dd, *J* = 5.9, 2.8 Hz, 2H), 6.88 (dd, *J* = 9.0, 2.8 Hz, 1H), 4.06 (s, 3H), 3.82 (s, 3H), 1.43 (s, 6H). <sup>13</sup>C NMR (101 MHz, CDCl<sub>3</sub>) δ 165.0, 156.1, 153.3, 153.2, 149.9, 77.6, 65.5,

57.3, 55.8, 31.1. HRMS calcd for C<sub>20</sub>H<sub>20</sub>O<sub>6</sub> [M + Na]<sup>+</sup> 379.1158; Found: 379.1195.

**1-(2-hydroxypropan-2-yl)-4,10-dimethoxy-3a1,6a-dihydro-3H-pyrano[3,4,5-kl]xanthen-3-one(11).**

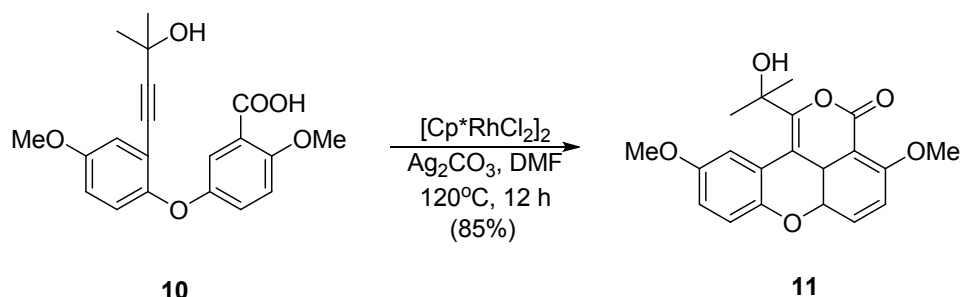

A mixture of **10** (0.71 g, 2.0 mmol), [Cp<sup>\*</sup>RhCl<sub>2</sub>]<sub>2</sub> (12.4 mg, 0.02 mmol), Ag<sub>2</sub>CO<sub>3</sub> (0.61 g, 2.2 mmol) and DMF (20 mL) in a 25 mL of sealed tube was heated at 120 °C for 12 h under nitrogen atmosphere. The reaction was monitored for completion by TLC. Upon completion, the reaction mixture was cooled to room temperature and the reaction mixture was partitioned between DCM (2 × 100 mL) and water (2 × 100 mL). The organic layer was separated, and the aqueous layer was extracted with DCM (100 mL). The combined organic fractions were washed with brine (100 mL), dried over anhydrous Na<sub>2</sub>SO<sub>4</sub> and concentrated under reduced pressure. The crude residue was purified by flash chromatography over silica gel (PE/EtOAc = 2/1) to yield the product **11** as a yellow solid (0.6 g, 85%), mp 108 °C. <sup>1</sup>H NMR (400 MHz, CDCl<sub>3</sub>) δ 7.78 (d, *J* = 2.6 Hz, 1H), 7.29 (s, 1H), 6.94 (dd, *J* = 13.3, 9.0 Hz, 2H), 6.86 (dd, *J* = 8.9, 2.7 Hz, 1H), 3.96 (s, 4H), 3.85 (s, 3H), 1.76 (s, 6H). <sup>13</sup>C NMR (101 MHz, CDCl<sub>3</sub>) δ 157.5, 155.7, 154.6, 153.5, 146.1, 142.8, 126.5, 121.2, 117.0, 116.9, 116.4, 115.4, 111.1, 108.2, 106.2, 73.7, 56.6, 55.9, 29.4. HRMS calcd for C<sub>20</sub> H<sub>18</sub>O<sub>6</sub> [M + Na]<sup>+</sup> 377.1001; Found: 377.0985.

**4,10-dimethoxy-3a1,6a-dihydro-3H-pyrano[3,4,5-kl]xanthen-3-one(12).**

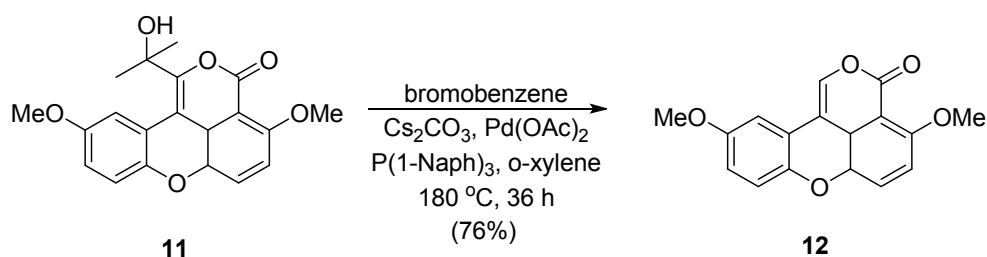

A mixture of **11** (178.0 mg, 0.5 mmol), Pd(OAc)<sub>2</sub> (11.2 mg, 0.05 mmol), Cs<sub>2</sub>CO<sub>3</sub> (0.1 mmol, 32.6 mg), P(1-Naph)<sub>3</sub> (0.1 mmol, 41.3 mg), bromobenzene (0.1 mmol, 15.7 mg) and o-xylene (10 mL) in a 25 mL of sealed tube was heated at 180 °C for 36 h under nitrogen atmosphere. The reaction was monitored for completion by TLC. Upon completion, the reaction mixture was cooled to room temperature and the reaction mixture was partitioned between DCM (2 × 50 mL) and water (2 × 50 mL). The organic layer was separated, and the aqueous layer was extracted with DCM (2 × 50 mL). The combined organic fractions were washed with brine (50 mL), dried over anhydrous Mg<sub>2</sub>SO<sub>4</sub> and concentrated under reduced pressure. The crude residue

was purified by flash chromatography over silica gel (PE/EtOAc = 2/1) to yield the product **12** as a yellow solid (113 mg, 76%), mp 185°C. <sup>13</sup>C NMR (101 MHz, CDCl<sub>3</sub>) δ 158.1, 156.3, 155.8, 144.1, 142.1, 134.6, 122.9, 121.7, 118.3, 116.6, 115.0, 112.3, 108.7, 108.4, 105.0, 77.3, 77.0, 76.7, 56.6, 55.8, 29.7. HRMS calcd for C<sub>14</sub>H<sub>14</sub>O<sub>5</sub> [M + Na]<sup>+</sup> 321.0739; Found: 321.1131.

**4,10-dihydroxy-3a,6a-dihydro-3H-pyrano[3,4,5-kl]xanthen-3-one (SsnB).**

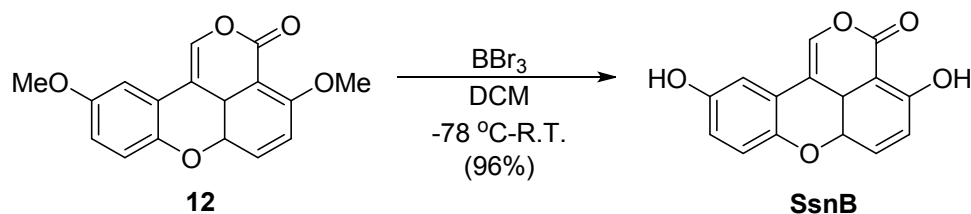

The start material of **12** (119 mg, 0.4 mmol) was dissolved in 3 mL of DCM in flask and cooled to -78°C under argon atmosphere. BBr<sub>3</sub> (0.58 mL, 1.2 mmol, diluted with DCM, V<sub>BBr<sub>3</sub></sub>/V<sub>DCM</sub> = 1/4) was dropwised slowly via a syringe, and then raised to room temperature until TLC indicated complete consumption of **12**. The reaction mixture was quenched with H<sub>2</sub>O (50 mL), extracted with DCM (2 × 60 mL) and then dried over Mg<sub>2</sub>SO<sub>4</sub>. After evaporation of the solvent under vacuum, the crude residue was purified by flash chromatography over silica gel (PE/EtOAc = 2/1) to yield the product of SsnB as a yellow solid (103 mg, 96%yield). <sup>1</sup>H NMR (400 MHz, DMSO) δ 10.36 (s, 1H), 9.53 (s, 1H), 7.97 (s, 1H), 7.47 (d, *J* = 9.0 Hz, 1H), 7.09 (d, *J* = 2.7 Hz, 1H), 7.06 (d, *J* = 9.0 Hz, 1H), 7.02 (d, *J* = 8.9 Hz, 1H), 6.82 (dd, *J* = 8.9, 2.7 Hz, 1H). <sup>13</sup>C NMR (101 MHz, DMSO) δ 164.3, 155.4, 154.2, 143.1, 140.9, 135.3, 123.9, 120.2, 118.6, 118.5, 117.6, 115.0, 109.9, 108.0, 105.0.

**[(2,5-dimethoxyphenyl)ethynyl]trimethylsilane(14)**

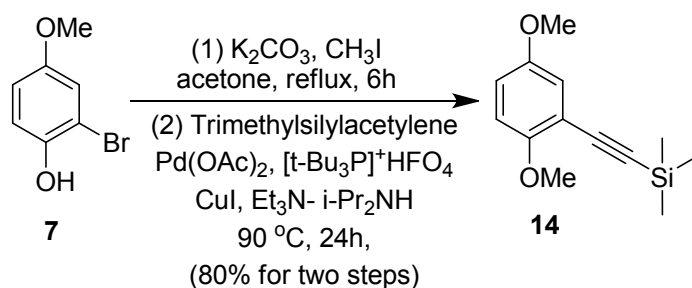

The 2-bromo-4-methoxyphenol **7** (0.42 g, 2.1 mmol) was dissolved in 30mL of acetone. K<sub>2</sub>CO<sub>3</sub> (0.57 g, 4.2 mmol) was added in one portion. After stirring for 10 minutes at room temperature, CH<sub>3</sub>I (0.38mL, 6.3mmol) was added. The reaction mixture was kept stirring for 6 h at 60 °C. After the TLC indicated complete consumption of phenol, K<sub>2</sub>CO<sub>3</sub> was filtered. The residue was washed with 60 mL of EtOAc. After evaporated of the solvent under vacuum, the product obtained was directly used in the subsequent step without further purification. The product obtained (0.43 g, 2.0 mmol), Pd(OAc)<sub>2</sub> (28 mg, 0.10 mmol), [t-Bu<sub>3</sub>P]<sup>+</sup>HFO<sub>4</sub><sup>-</sup> (35 mg, 0.12 mmol), CuI (7.6 mg, 0.04 mmol), Trimethylsilylacetylene (0.57 mL, 4 mmol), Et<sub>3</sub>N (15 mL) and i-Pr<sub>2</sub>NH (15 mL) in a 50 mL of sealed tube was heated at 90 °C for

24 h under nitrogen atmosphere. After the reaction completed, the tube was cooled to room temperature and the solvent was removed under reduced pressure. The reaction mixture was partitioned between EtOAc (2 × 100 mL) and water (2 × 80 mL). The organic layer was separated, and the aqueous layer was extracted with EtOAc (2 × 100 mL). The combined organic fractions were washed with 3% aqueous HCl (100 mL), dried over anhydrous Na<sub>2</sub>SO<sub>4</sub> and concentrated under reduced pressure. The crude residue was purified by flash chromatography over silica gel (PE/EtOAc = 10/1) to yield the product **14** as yellow solid (0.39 g, 80% yield for two steps). Spectroscopic data matched that previously reported.<sup>5</sup> <sup>1</sup>H NMR (400 MHz, CDCl<sub>3</sub>) δ 7.00 (d, *J* = 3.0 Hz, 1H), 6.89 – 6.83 (m, 1H), 6.80 (d, *J* = 9.0 Hz, 1H), 3.86 (s, 3H), 3.78 (s, 3H), 0.29 (s, 10H).

**methyl 2-methoxy-5-(4-methoxyphenoxy)benzoate(19)**

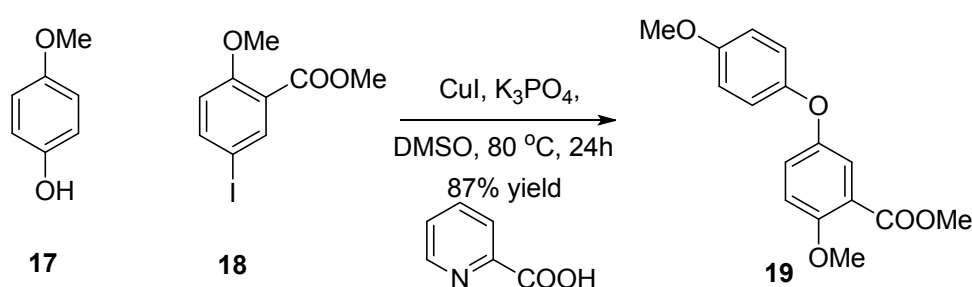

A mixture of **17** (0.51 g, 4.1 mmol), **18** (1.1 g, 3.8 mmol), CuI (36 mg, 0.19 mmol), K<sub>3</sub>PO<sub>4</sub> (1.6 g, 7.5 mmol), picolinic acid (46 mg, 0.38 mmol) and DMSO (30 mL) in a 50 mL of sealed tube was heated at 80 °C for 24 h under nitrogen atmosphere. After completed, the reaction mixture was cooled to room temperature and the reaction mixture was partitioned between EtOAc (2 × 100 mL) and water (2 × 100 mL). The organic layer was separated and the aqueous layer was extracted with EtOAc (100 mL). The combined organic fractions were washed with brine (100 mL), dried over anhydrous Mg<sub>2</sub>SO<sub>4</sub> and concentrated under reduced pressure. The crude residue was purified by flash chromatography over silica gel (PE/EtOAc = 5/1) to yield the product **19** as yellow oil (0.95 g, 87% yield). <sup>1</sup>H NMR (400 MHz, CDCl<sub>3</sub>) δ 7.43 (d, *J* = 3.0 Hz, 1H), 7.12 (dd, *J* = 9.0, 3.0 Hz, 1H), 6.95 (d, *J* = 9.6 Hz, 3H), 6.89 (d, *J* = 9.1 Hz, 2H), 3.91 (s, 4H), 3.88 (s, 3H), 3.82 (s, 3H). <sup>13</sup>C NMR (101 MHz, CDCl<sub>3</sub>) δ 166.1, 155.7, 154.9, 151.0, 150.9, 123.4, 121.3, 120.8, 119.8, 114.9, 113.5, 56.6, 55.7, 52.2.

**methyl 5-(3-bromo-4-methoxyphenoxy)-2-methoxybenzoate(20)**

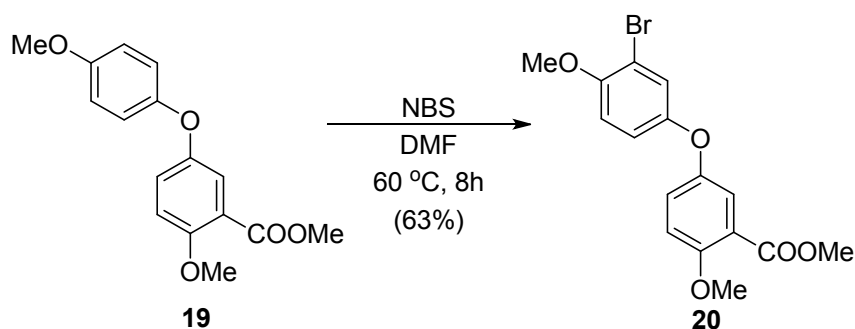

To a solution of diaryl ether **19** (57.6 mg, 0.2 mmol) in DMF (1 mL) was added

dropwise a solution of N-Bromosuccinimide (39.2 mg, 0.24 mmol dissolved in an additional 1.0 mL of DMF) at room temperature, the resulting bright yellow solution was stirred for 30 minutes, and then raised to 60 °C, stirring for 8h. Upon completion, the reaction mixture was quenched with H<sub>2</sub>O (15 mL), extracted with EtOAc (2 × 10 mL). The combined organic fractions were dried over anhydrous Mg<sub>2</sub>SO<sub>4</sub> and concentrated under reduced pressure. The crude residue was purified by flash chromatography over silica gel (PE/EtOAc = 10/1) to yield the product as yellow oil (46 mg, 63% yield). <sup>1</sup>H NMR (400 MHz, CDCl<sub>3</sub>) δ 7.44 (d, *J* = 3.1 Hz, 1H), 7.21 (d, *J* = 2.8 Hz, 1H), 7.13 (dd, *J* = 9.0, 3.1 Hz, 1H), 6.97 (d, *J* = 9.0 Hz, 1H), 6.93 (dd, *J* = 8.9, 2.8 Hz, 1H), 6.87 (d, *J* = 8.9 Hz, 1H), 3.91 (s, 3H), 3.89 (d, *J* = 1.9 Hz, 6H). <sup>13</sup>C NMR (101 MHz, CDCl<sub>3</sub>) δ 166.0, 155.3, 152.1, 151.5, 150.2, 123.9, 123.7, 121.8, 121.0 (s), 118.3, 113.6, 112.6, 112.0, 56.7, 56.6, 52.2.

### 2-bromo-4-methoxyphenol (**7**)

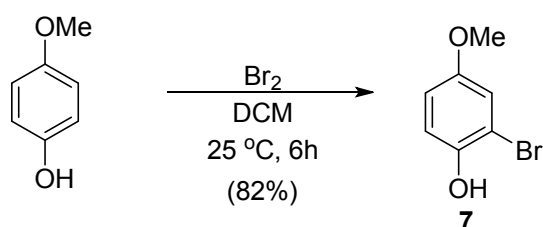

To a stirred solution of 4-methoxyphenol (3.0 g, 24.2 mmol) in DCM (100 mL) was slowly added a solution of bromine (1.37 mL, 26.6 mmol, dissolved in 20 mL of DCM) at room temperature. After completed, stirring at room temperature until TLC indicated complete consumption of phenol. The reaction mixture was treated with saturated aqueous Na<sub>2</sub>SO<sub>3</sub> solution until the violet color disappeared. The mixture was partitioned between DCM (2 × 150 mL) and water (2 × 100 mL). The organic phase was separated, washed with brine (80 mL) and then dried over Mg<sub>2</sub>SO<sub>4</sub>. The organic layer was concentrated in vacuo and the crude residue was purified by flash chromatography over silica gel (PE/EtOAc = 5/1) to yield the product **7** as a brown solid, (4.0 g, 82%). Spectroscopic data matched that previously reported.<sup>6</sup> <sup>1</sup>H NMR (400 MHz, CDCl<sub>3</sub>) δ 7.04 (d, *J* = 2.9 Hz, 1H), 6.96 (d, *J* = 8.9 Hz, 1H), 6.82 (dd, *J* = 8.9, 2.9 Hz, 1H), 5.24 (s, 1H), 3.77 (s, 3H).

### methyl 5-bromo-2-methoxybenzoate

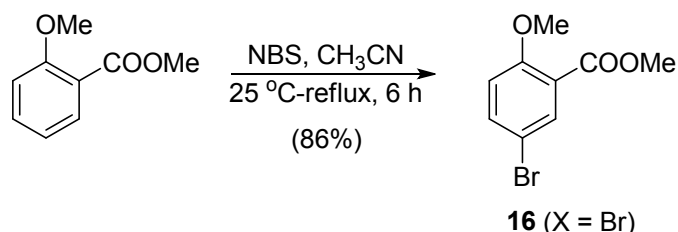

To a stirred solution of methyl 2-methoxybenzoate (0.83 g, 5.0 mmol) in CH<sub>3</sub>CN (20 mL) was slowly added a solution of N-Bromosuccinimide (0.98 g, 5.5 mmol, dissolved in additional 20 mL of CH<sub>3</sub>CN) at room temperature. The reaction mixture was raised to 60 °C and stirring until TLC indicating the complete consumption of methyl 2-methoxybenzoate. After evaporated of the solvent under vacuum, the residue

mixture was diluted with H<sub>2</sub>O (120 mL), extracted with EtOAc (2 × 100 mL), the organic phase was combined, dried over Mg<sub>2</sub>SO<sub>4</sub>, evaporated under vacuum. The crude residue was purified by flash chromatography over silica gel (PE/EtOAc = 10/1) to yield the product as white solid, (1.05 g, 86%). Spectroscopic data matched that previously reported.<sup>7</sup> <sup>1</sup>H NMR (400 MHz, CDCl<sub>3</sub>) δ 7.92 (d, *J* = 2.6 Hz, 1H), 7.57 (dd, *J* = 8.9, 2.6 Hz, 1H), 6.88 (d, *J* = 8.9 Hz, 1H), 3.91 (s, 6H).

#### methyl 5-iodo-2-methoxybenzoate

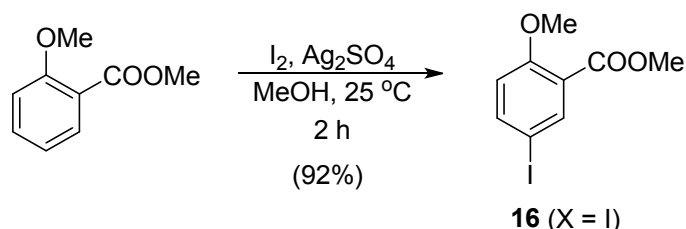

A suspension of methyl 2-methoxybenzoate (1.1 g, 7.0 mmol), iodine (2.03 g, 8.0 mmol) and Ag<sub>2</sub>SO<sub>4</sub> (2.8 g, 9.0 mmol) in methanol was stirred at room temperature for 2 h and then the solid was filtrated off. The filtrate was treated with saturated aqueous Na<sub>2</sub>SO<sub>3</sub> solution until the violet color disappeared and then concentrated under reduced pressure. The resulting residue was diluted with EtOAc (150 mL). The organic phase was washed with water (2 × 50 mL) and brine (30 mL), dried over Na<sub>2</sub>SO<sub>4</sub>. Upon removal of the solvent under reduced pressure, the crude residue was purified by flash chromatography over silica gel (PE/EtOAc = 10/1) to yield the product as a brown solid (1.78 g, 92%). Spectroscopic data matched that previously reported.<sup>8</sup> <sup>1</sup>H NMR (400 MHz, CDCl<sub>3</sub>) δ 7.92 (d, *J* = 2.6 Hz, 1H), 7.57 (dd, *J* = 8.9, 2.6 Hz, 1H), 6.88 (d, *J* = 8.9 Hz, 1H), 3.91 (s, 6H).

#### 2-ethynyl-1,4-dimethoxybenzene(13)

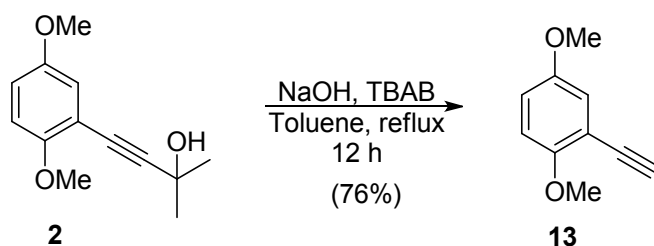

A suspension of **2** (1.0 g, 4.5 mmol), NaOH (0.55 g, 1.4 mmol) and TBAB (tetrabutyl ammonium bromide, 30 mg, 0.1 mmol) in 20 mL of toluene was stirred at 120 °C for 6 h. The reaction was monitored for completion by TLC. Upon completion the reaction mixture was cooled to room temperature and partitioned between EtOAc (2 × 80 mL) and water (2 × 50 mL). The organic layer was separated, and the aqueous layer was extracted with EtOAc (2 × 80 mL). The combined organic fractions were washed with brine, dried over anhydrous Mg<sub>2</sub>SO<sub>4</sub> and concentrated under reduced pressure. The crude residue was purified by flash chromatography over silica gel (PE/EtOAc = 10/1) to yield the product **13** as white solid (0.56 g, 76%). Spectroscopic data matched that previously reported.<sup>9</sup> <sup>1</sup>H NMR (400 MHz, CDCl<sub>3</sub>) δ 7.03 (d, *J* = 3.0 Hz, 1H), 6.90 (dd, *J* = 9.0, 3.0 Hz, 1H), 6.84 (d, *J* = 9.0 Hz, 1H), 3.89 (s, 3H), 3.79 (s, 3H),

3.33 (s, 1H).

## Reference

1. Manarin, F.; Roehrs, J. A.; Gay, R. M.; Brandao, R.; Menezes, P. H.; Nogueira, C. W.; Zeni, G., *J. Org. Chem.* **2009**, *74*, 2153-2162.
2. Esser, B.; Swager, T. M., *Angew. Chem.Int. Ed.* **2010**, *49*, 8872-8875.
3. Marcin, B.; Olofsson, B., *Org. Synth.* **2009**, *86*, 308.
4. Jalalian, N.; Petersen, T. B.; Olofsson, B., *Chem. Eur. J.* **2012**, *18*, 14140-14149.
5. Elicio, P. D.; Chao, M. N.; Galizzi, M.; Li, C.; Szajnman, S. H.; Docampo, R.; Moreno, S. N.; Rodriguez, J. B., *Eur. J. Med. Chem.* **2013**, *69*, 480-9.
6. Ting, C.-M.; Hsu, Y.-L.; Liu, R.-S., *Chem. Commun.* **2012**, *48*, 6577-6579.
7. Mo, F.; Yan, J. M.; Qiu, D.; Li, F.; Zhang, Y.; Wang, J., *Angew. Chem.Int. Ed.* **2010**, *49*, 2028-2032.
8. Wang, L.; Xiao, Z.-Y.; Hou, J.-L.; Wang, G.-T.; Jiang, X.-K.; Li, Z.-T., *Tetrahedron* **2009**, *65*, 10544-10551.
9. Flavia, M.; Juliano, A. R.; Rafaela, M.; ozzaquatro, G.; Ricardo, B.; Gilson, Z., *J. Org. Chem.* **2009**, *74*, 2153-2162.

## NMR spectra.

### $^1\text{H}$ NMR of **2**

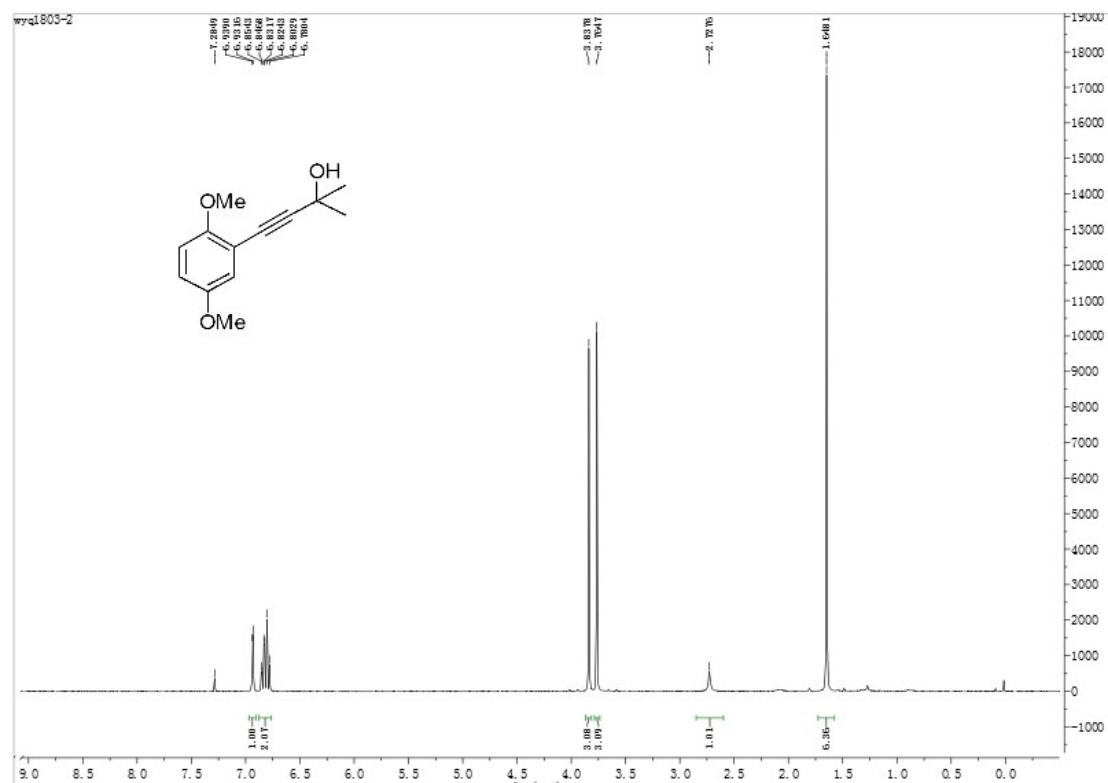

### $^{13}\text{C}$ NMR of **2**

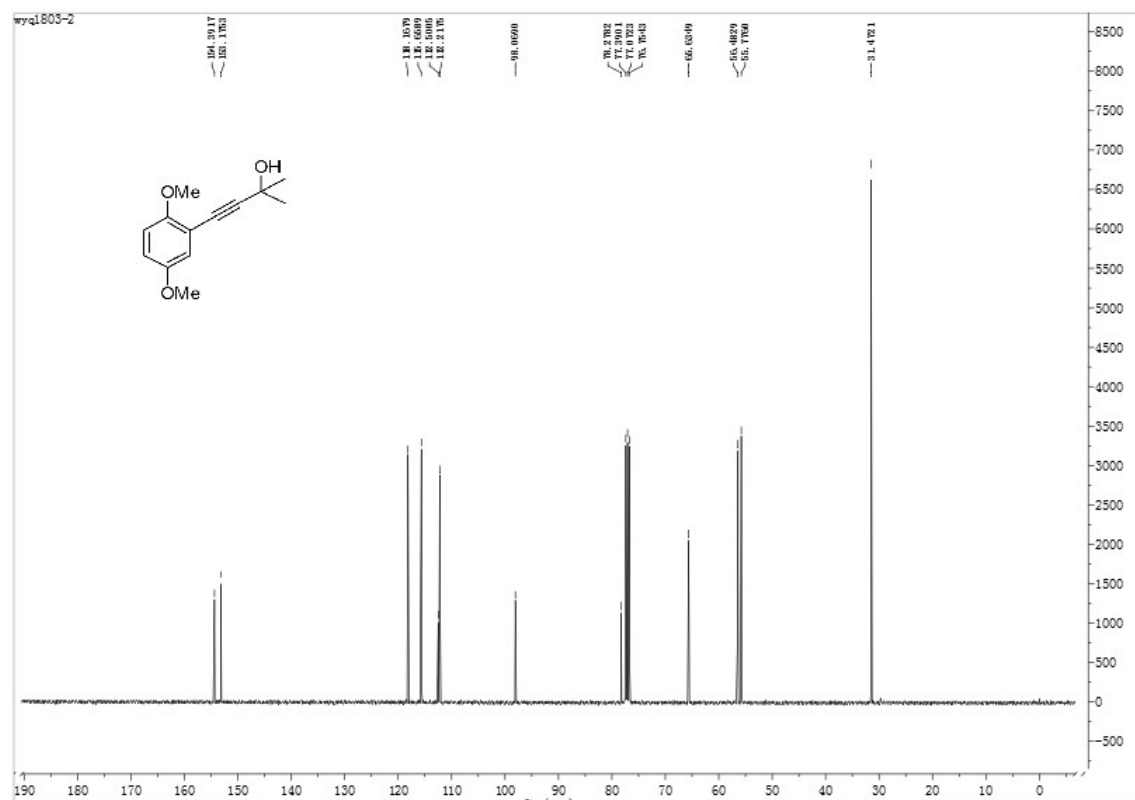

# <sup>1</sup>H NMR of 3

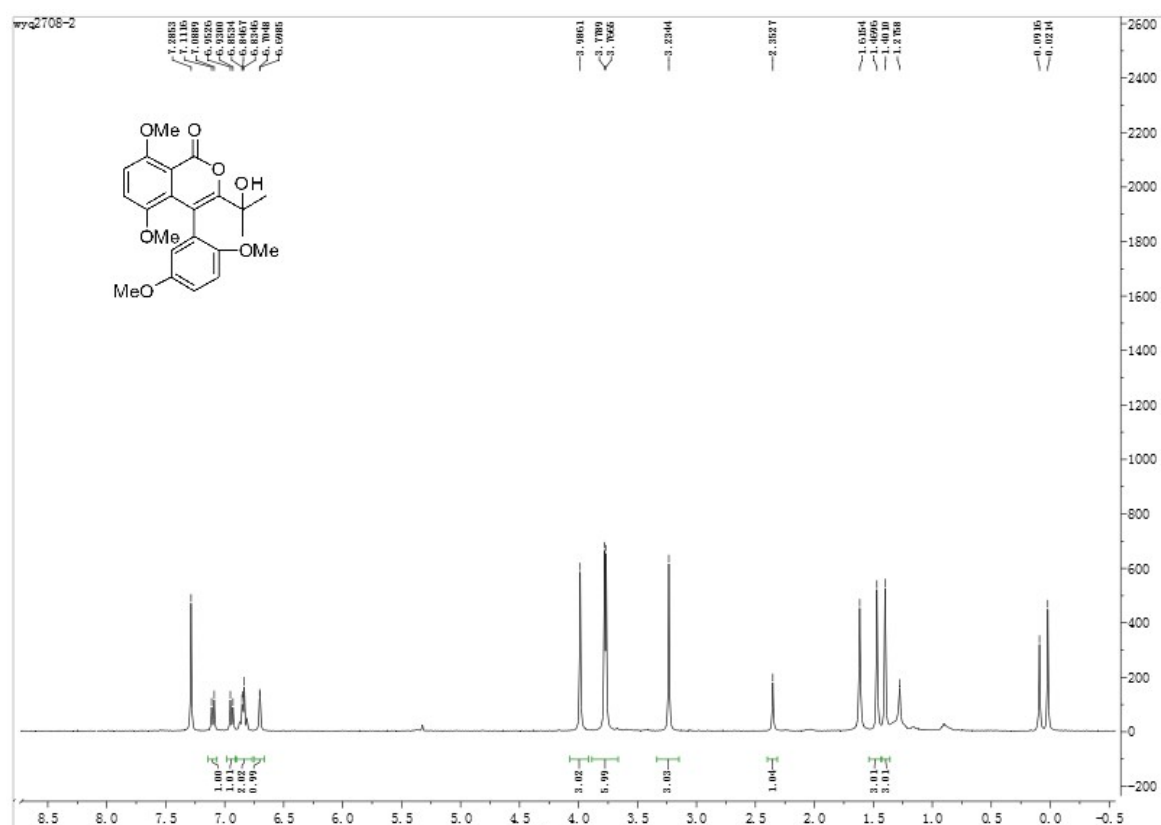

# <sup>13</sup>C NMR of 3

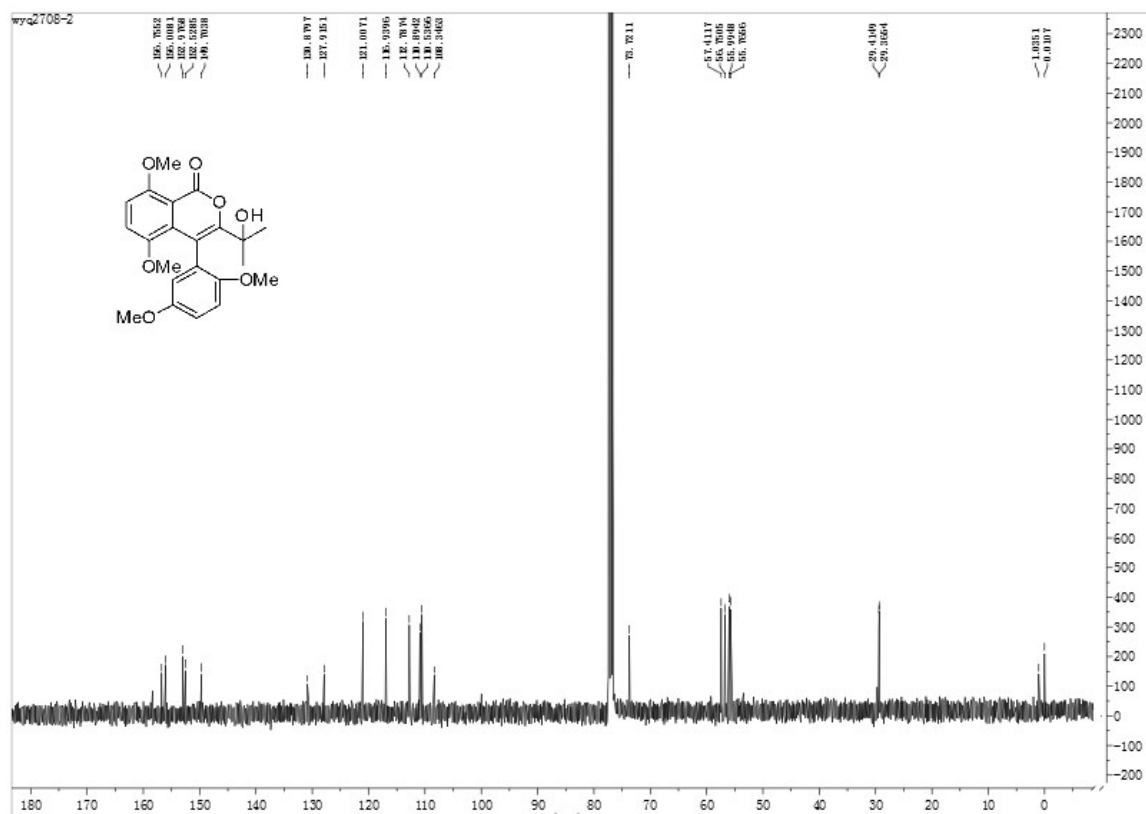

# <sup>1</sup>H NMR of 5

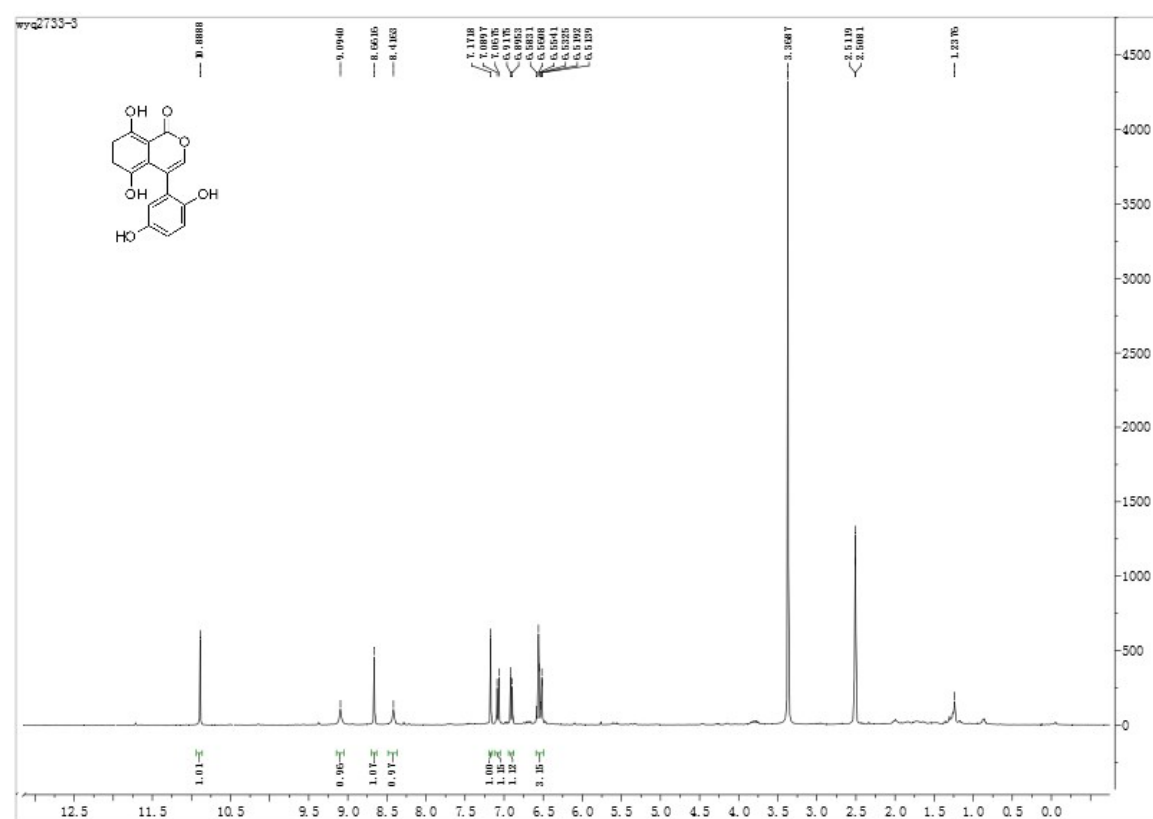

# <sup>13</sup>C NMR of 5

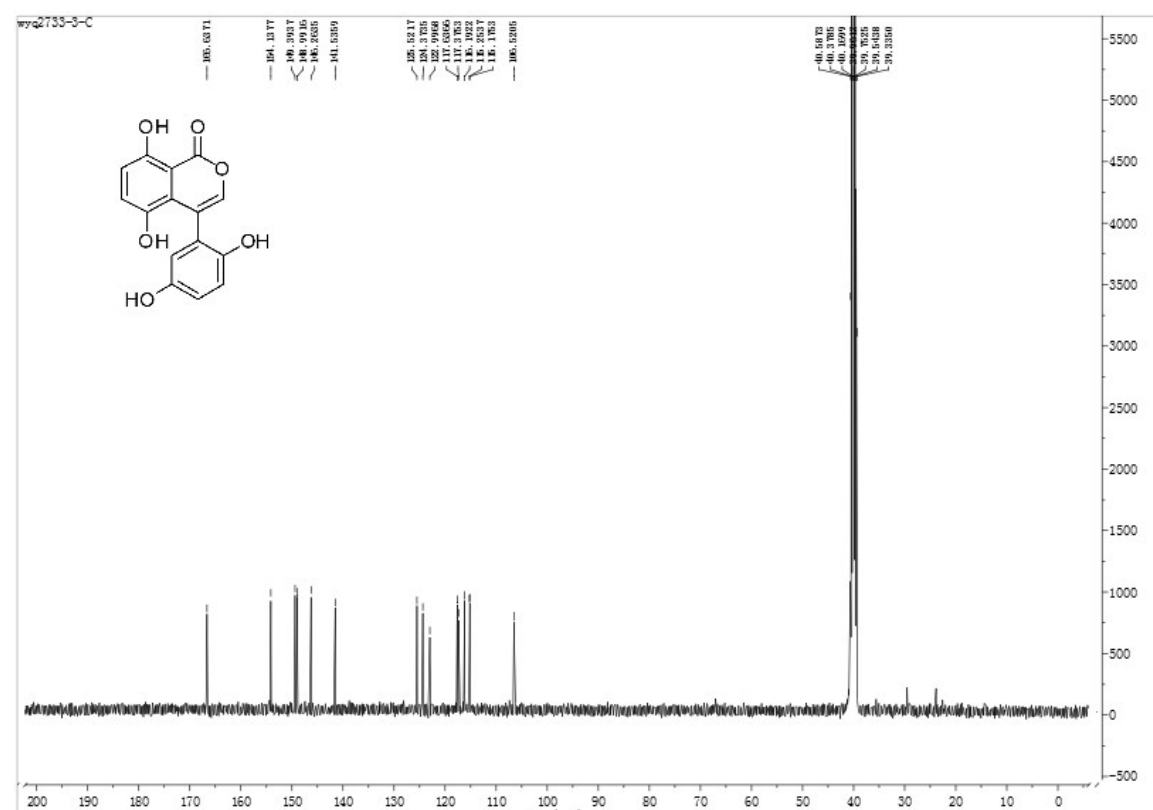

# <sup>1</sup>H NMR of SsnB

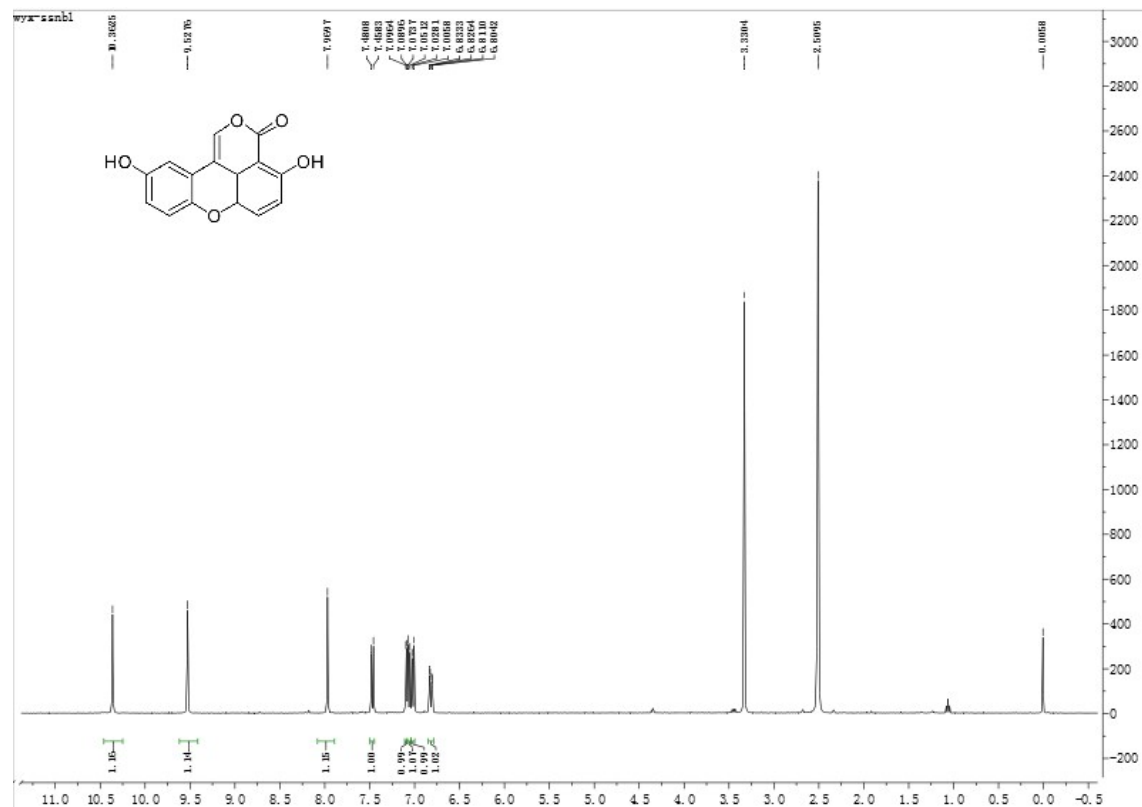

# <sup>13</sup>C NMR of SsnB

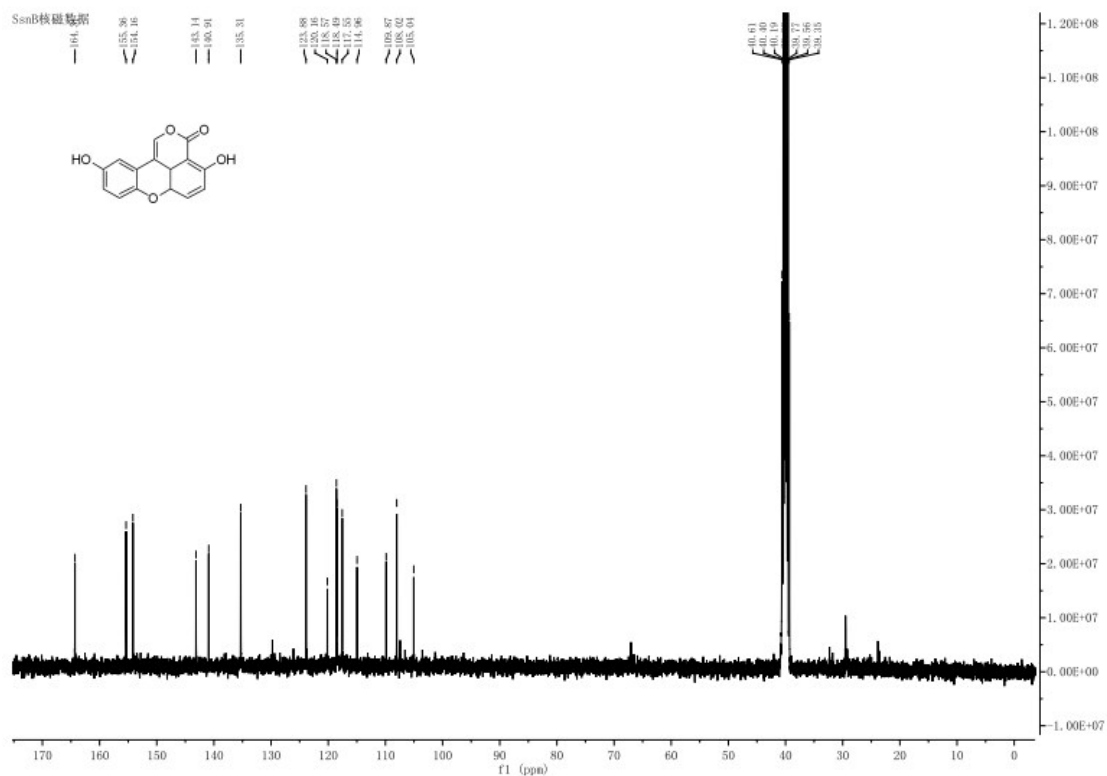

# <sup>1</sup>H NMR of 6

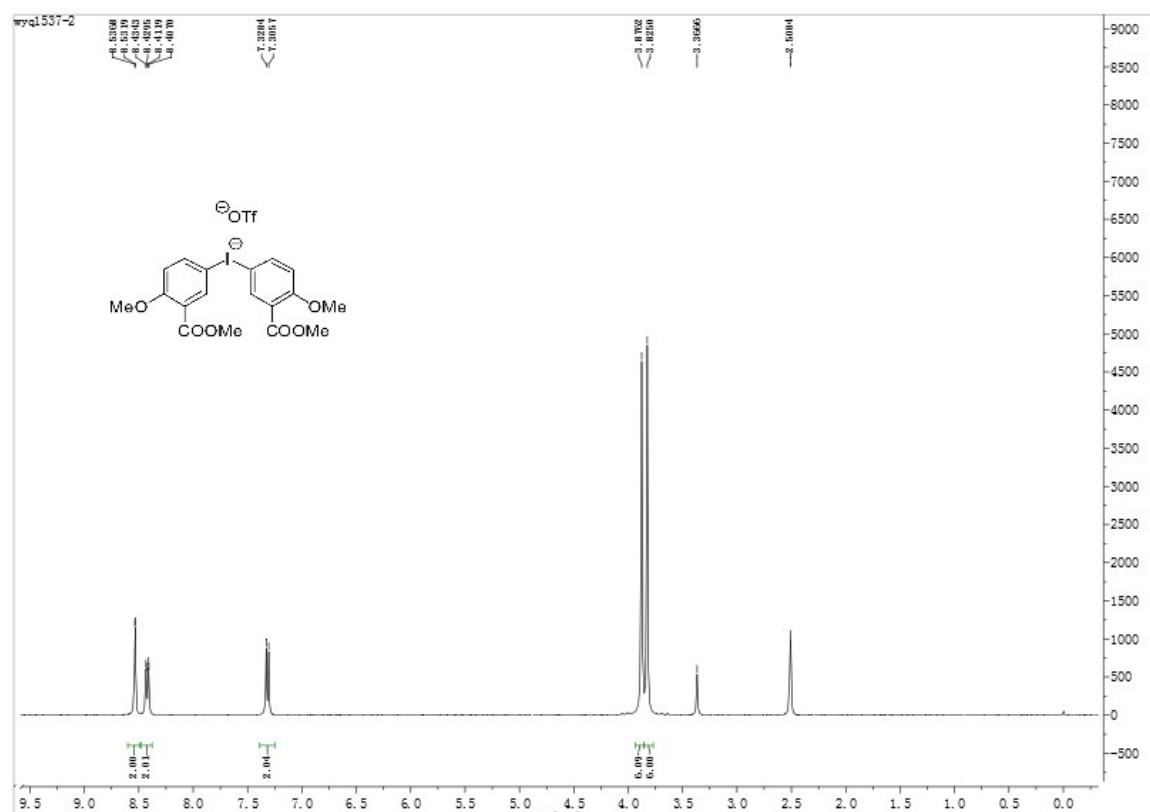

# <sup>13</sup>C NMR of 6

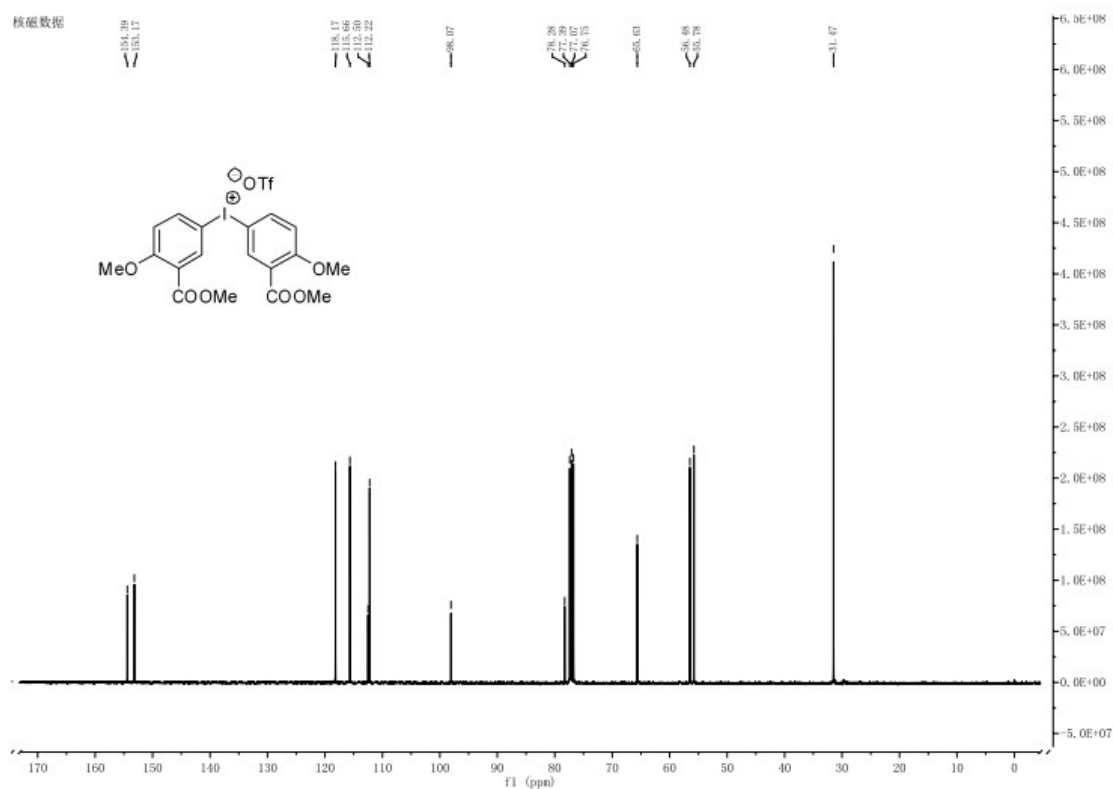

COC(=O)c1cc(Br)cc(Oc2ccc(OC)cc2)c1

<sup>1</sup>H NMR spectrum (CDCl<sub>3</sub>) of methyl 2-bromo-4-(4-methoxyphenoxy)benzoate. The spectrum shows aromatic signals between 6.5 and 7.5 ppm, a methoxy singlet at 3.8 ppm, a methyl ester singlet at 3.7 ppm, and a solvent triplet at 7.26 ppm. Integration values are provided for each signal group.

| Chemical Shift (ppm)         | Integration |
|------------------------------|-------------|
| 7.26 (triplet, solvent)      | 3.25        |
| 7.22 (doublet)               | 3.17        |
| 7.18 (doublet)               | 3.12        |
| 7.12 (doublet)               | 1.00        |
| 7.08 (doublet)               | 1.03        |
| 7.02 (doublet)               | 1.05        |
| 6.98 (doublet)               | 1.09        |
| 3.80 (singlet, methoxy)      | 3.25        |
| 3.70 (singlet, methyl ester) | 3.17        |

COC(=O)c1cc(OC)cc(OC1Oc2ccc(OC)cc2Br)c1

165.4369  
 164.8028  
 164.7941  
 164.7037  
 122.3458  
 121.9535  
 121.8626  
 120.2966  
 119.6946  
 118.4532  
 118.4075  
 118.4081  
 77.3637  
 76.7283  
 56.6089  
 55.8911  
 52.2004

# <sup>1</sup>H NMR of **10**

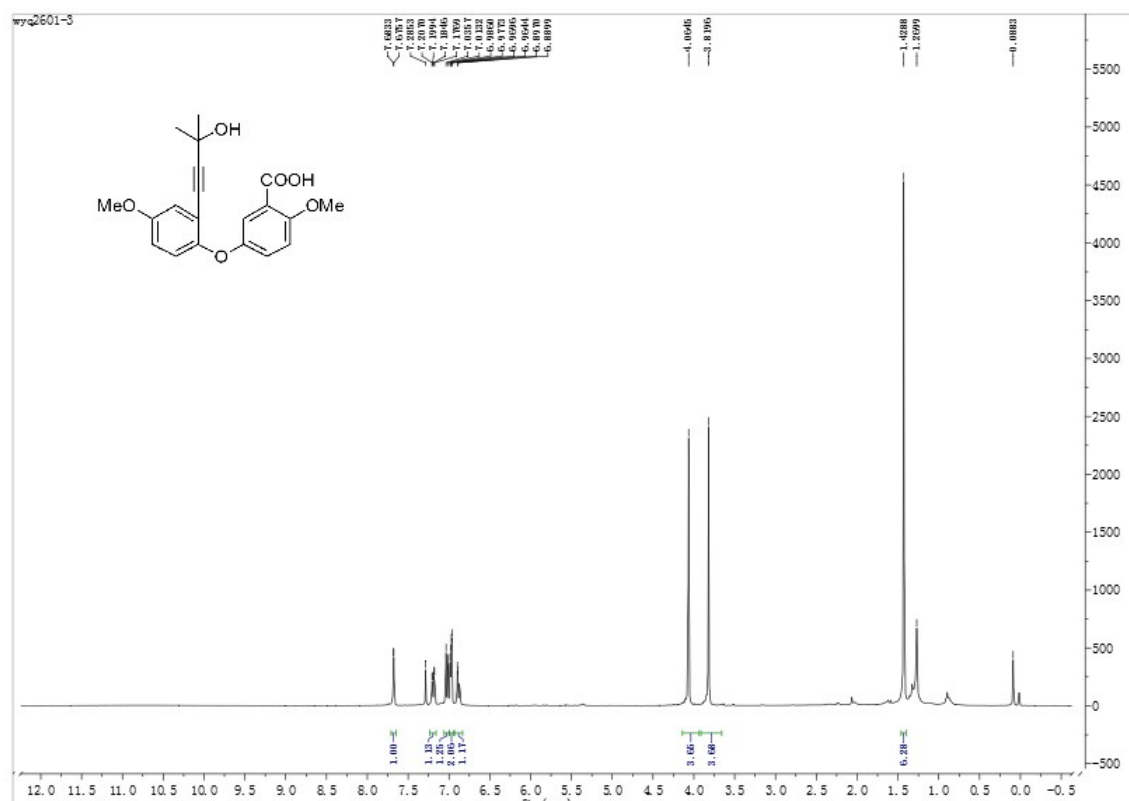

# <sup>13</sup>C NMR of **10**

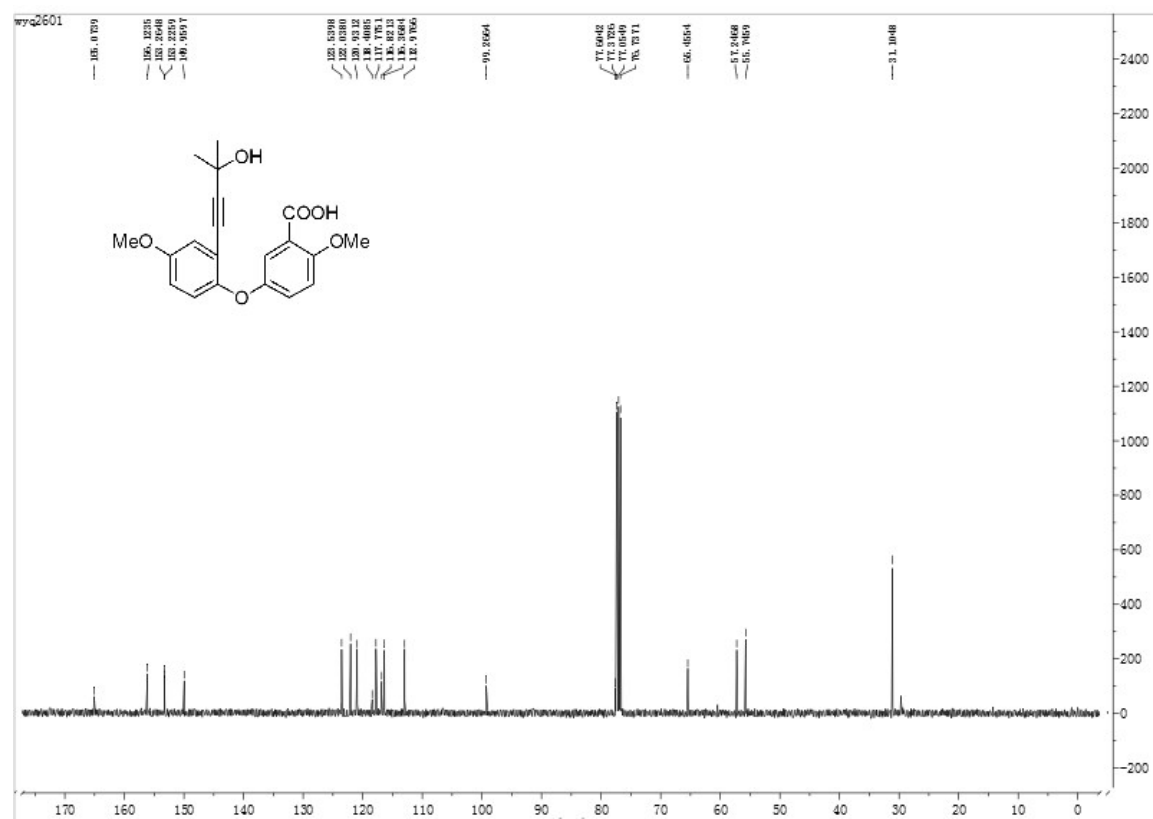

# <sup>1</sup>H NMR of **11**

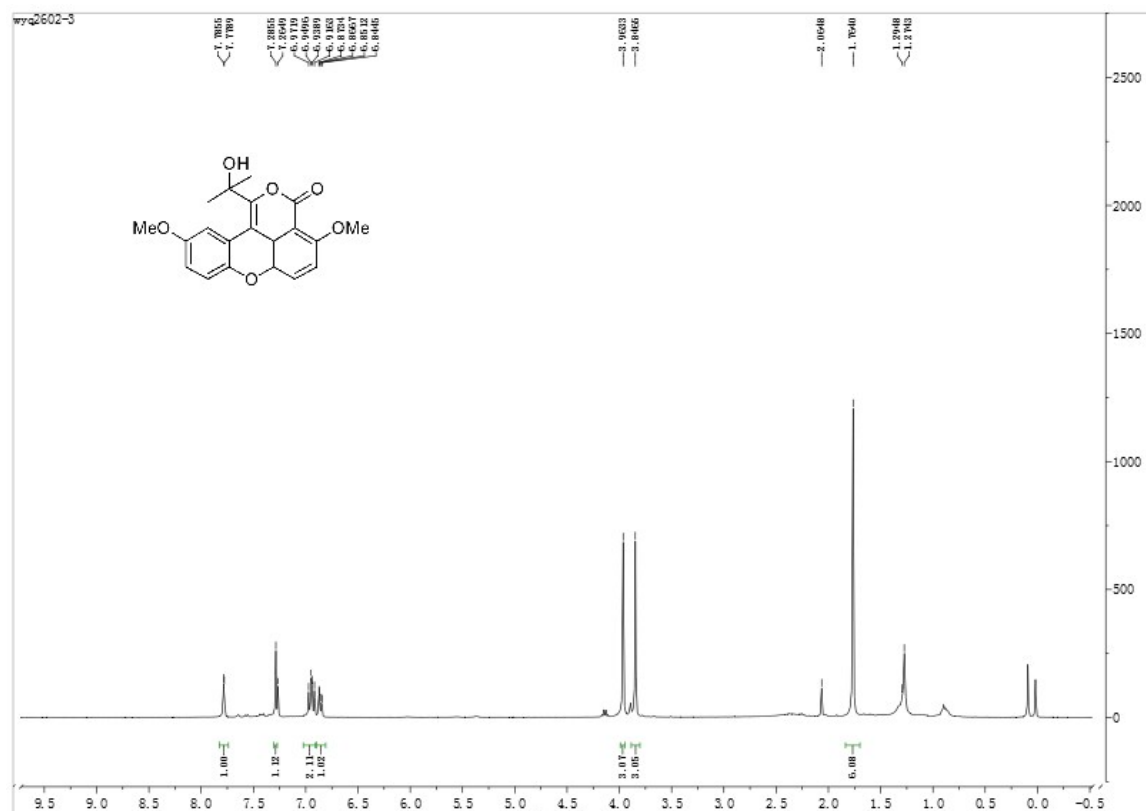

# <sup>13</sup>C NMR of **11**

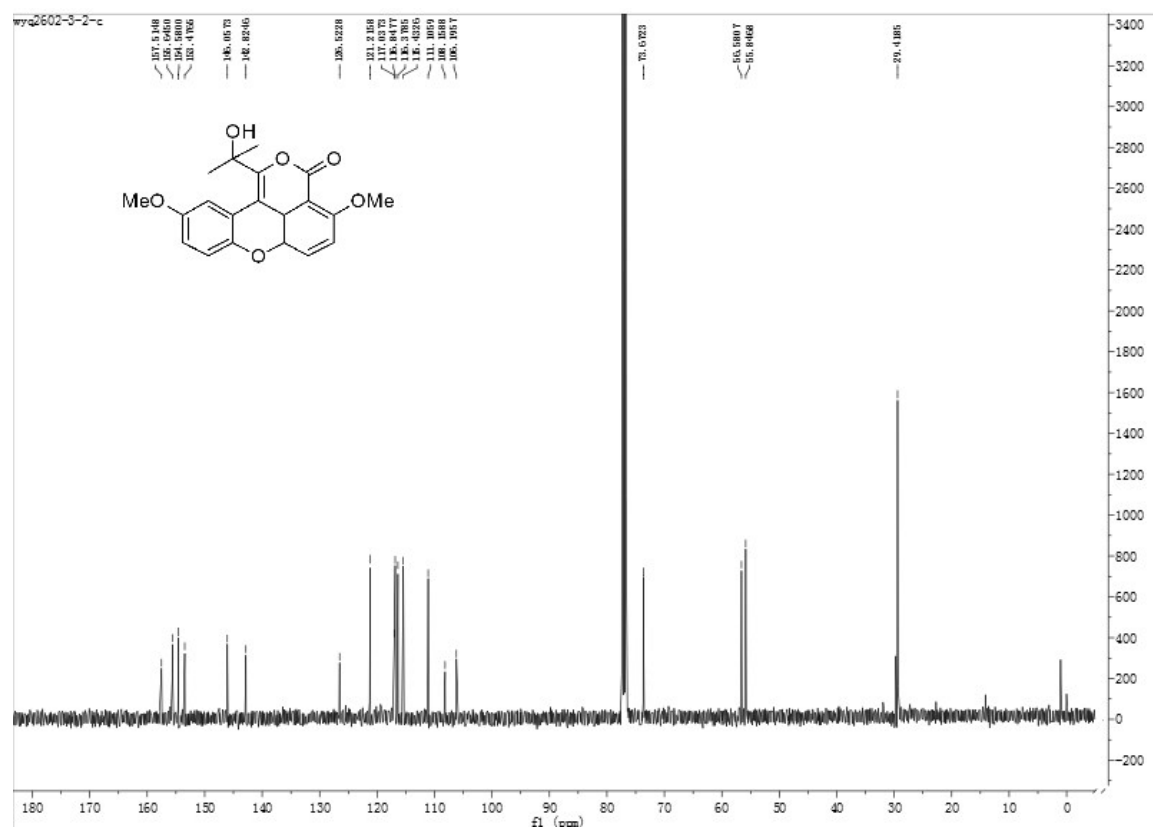

# <sup>1</sup>H NMR of **12**

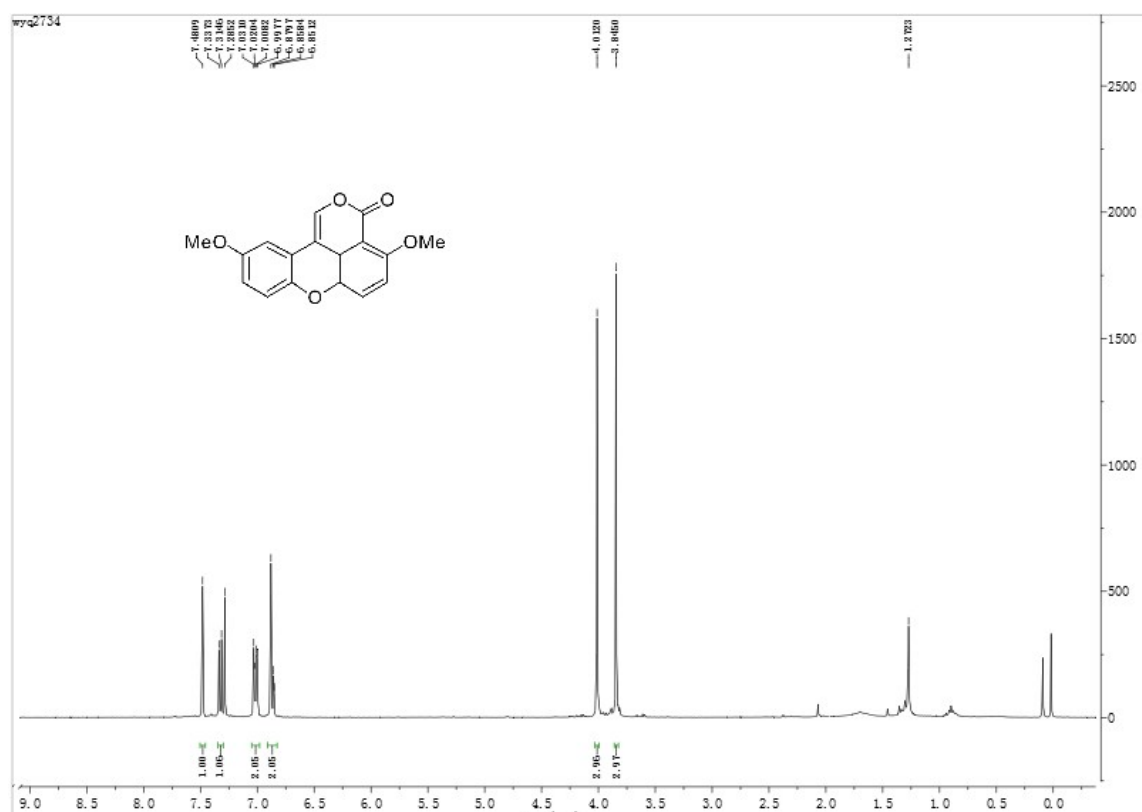

# <sup>13</sup>C NMR of **12**

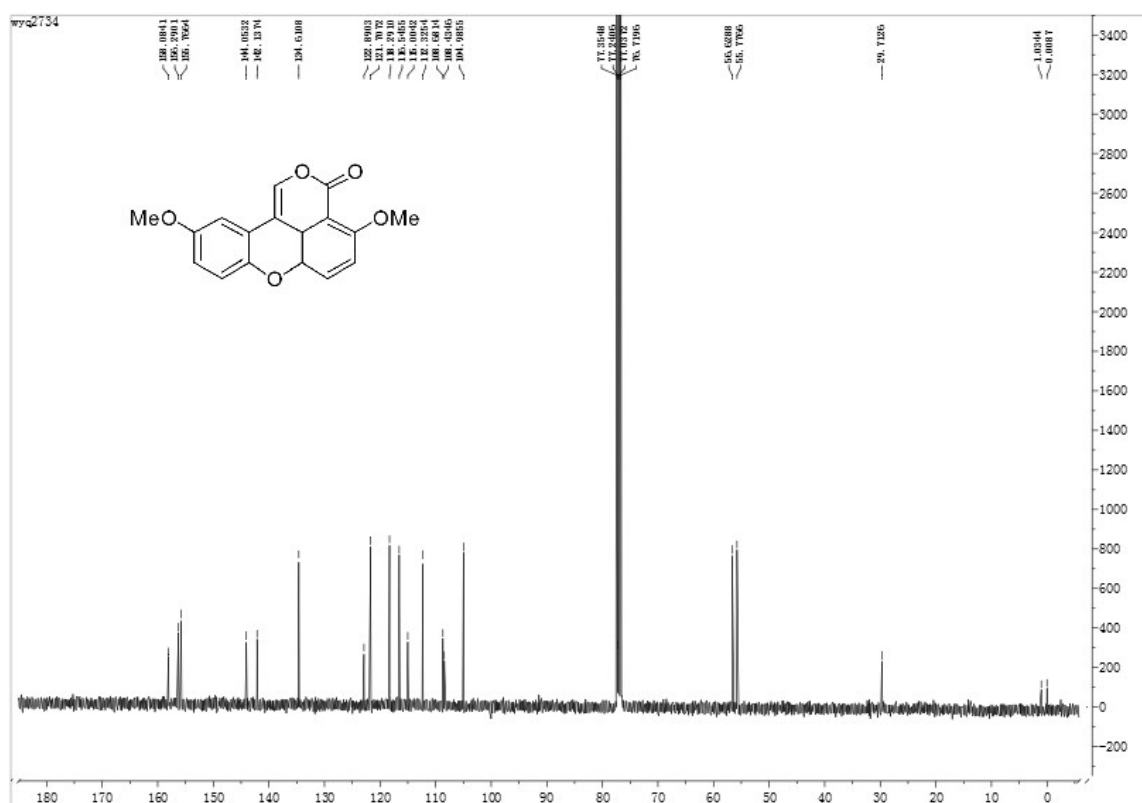

# <sup>1</sup>H NMR of 19

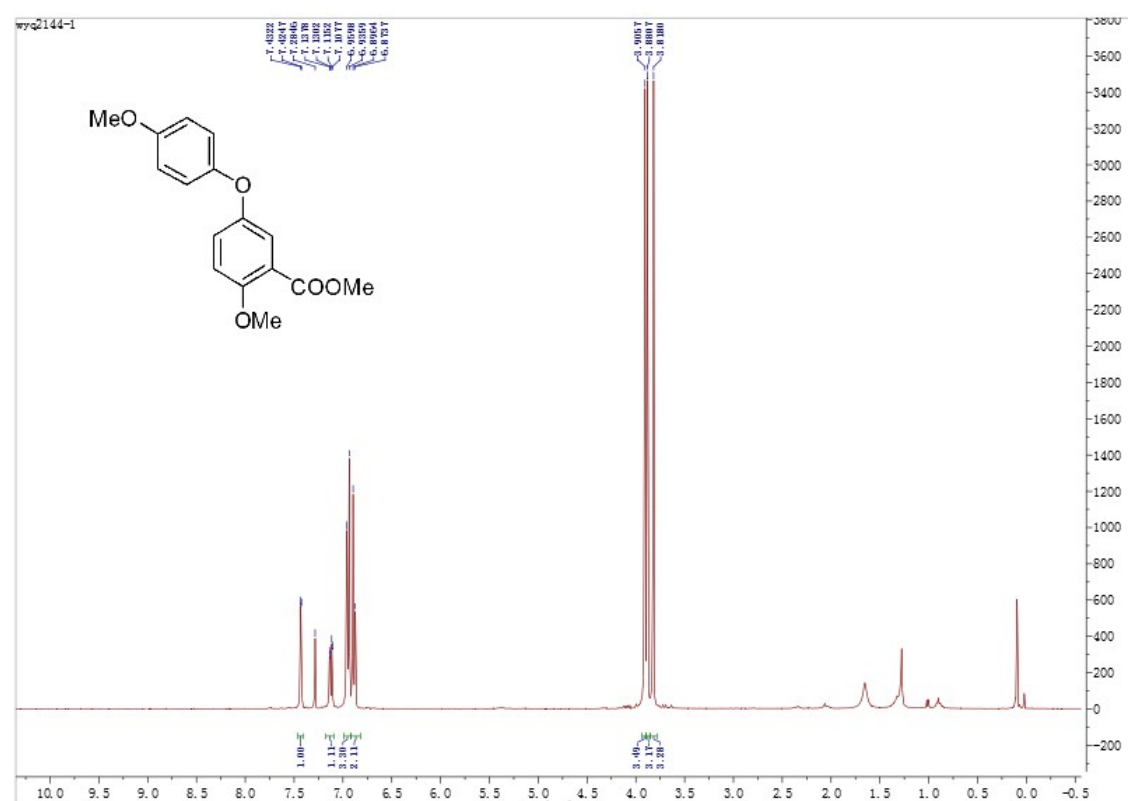

# <sup>13</sup>C NMR of 19

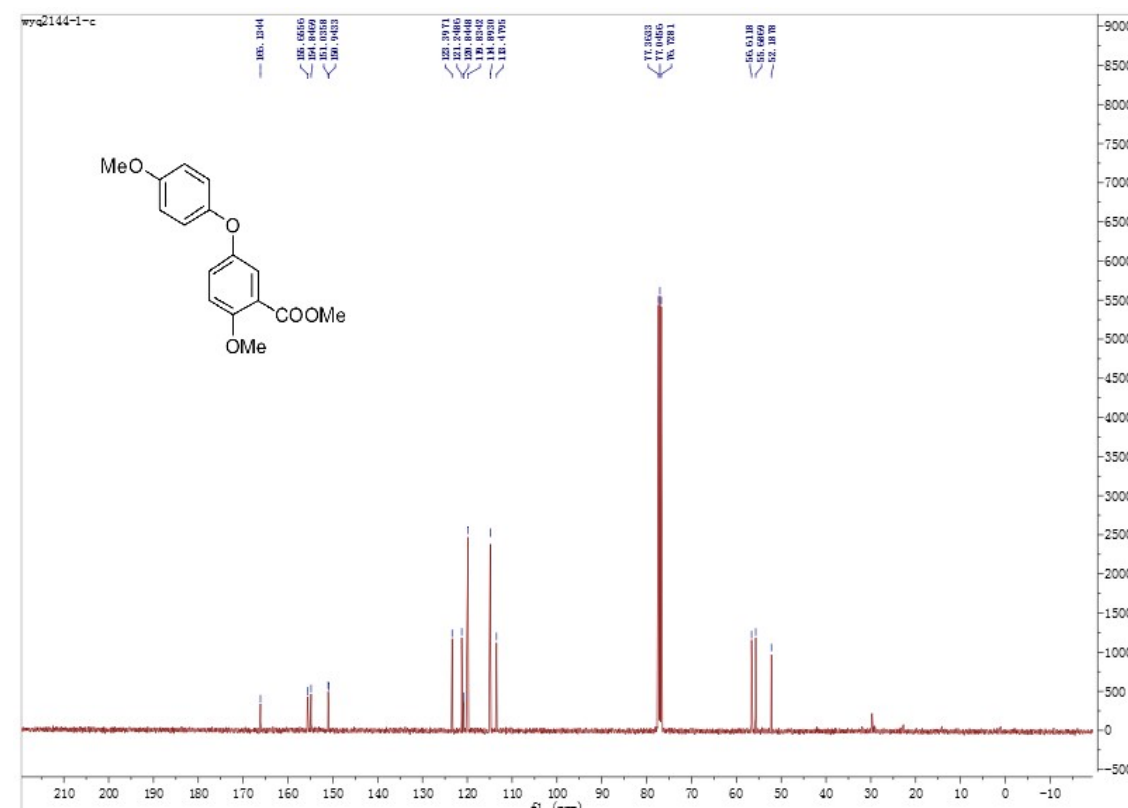

# <sup>1</sup>H NMR of **20**

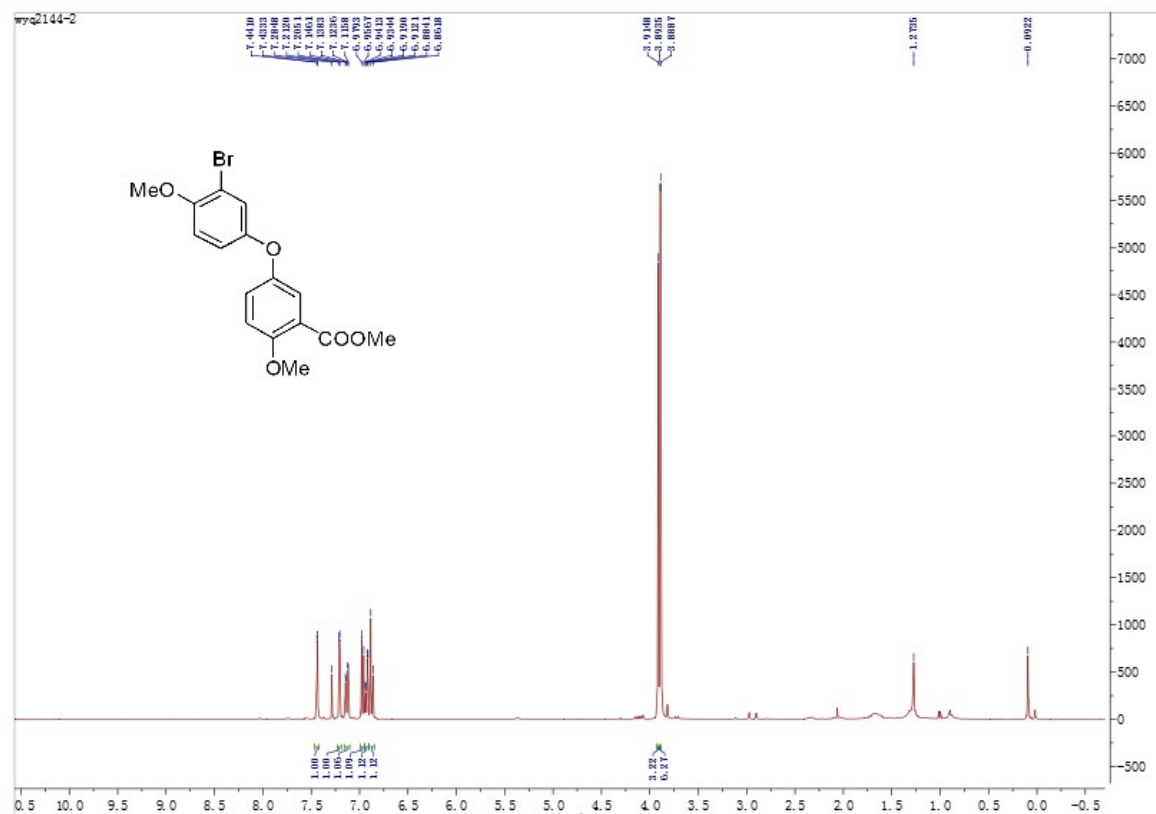

# <sup>13</sup>C NMR of **20**

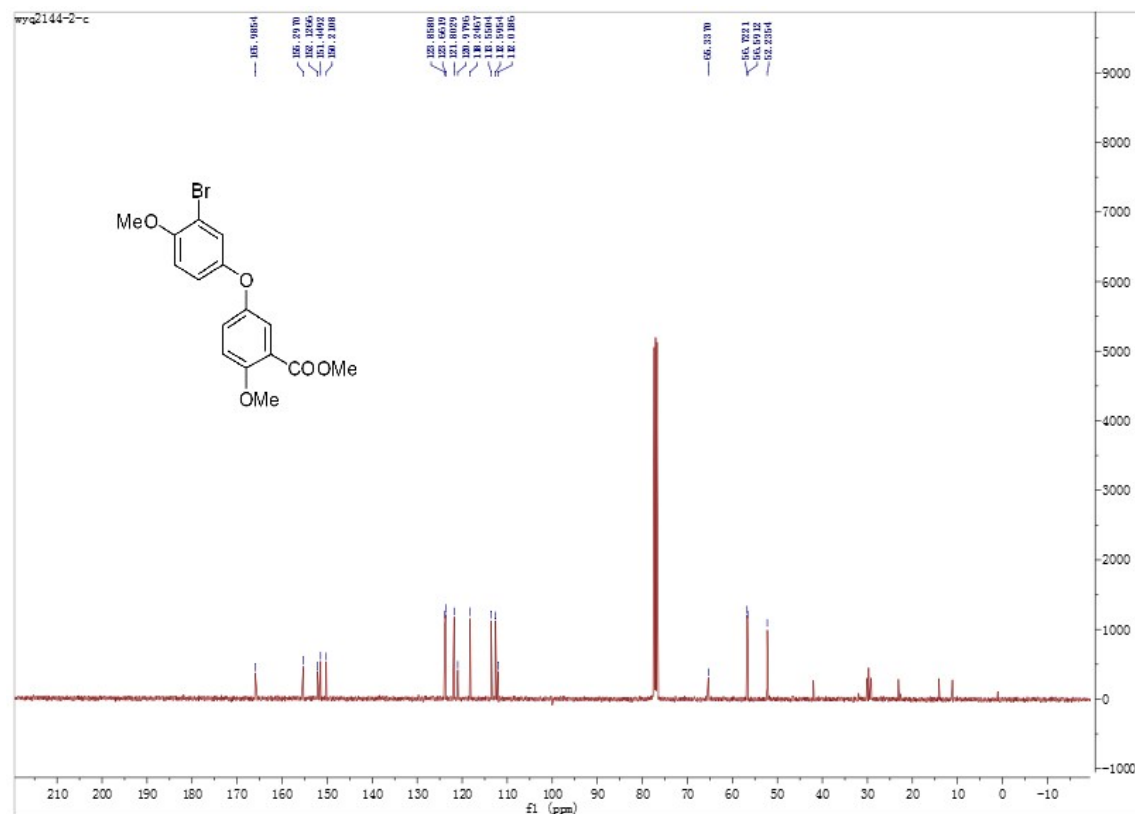

# <sup>1</sup>H NMR of **14**

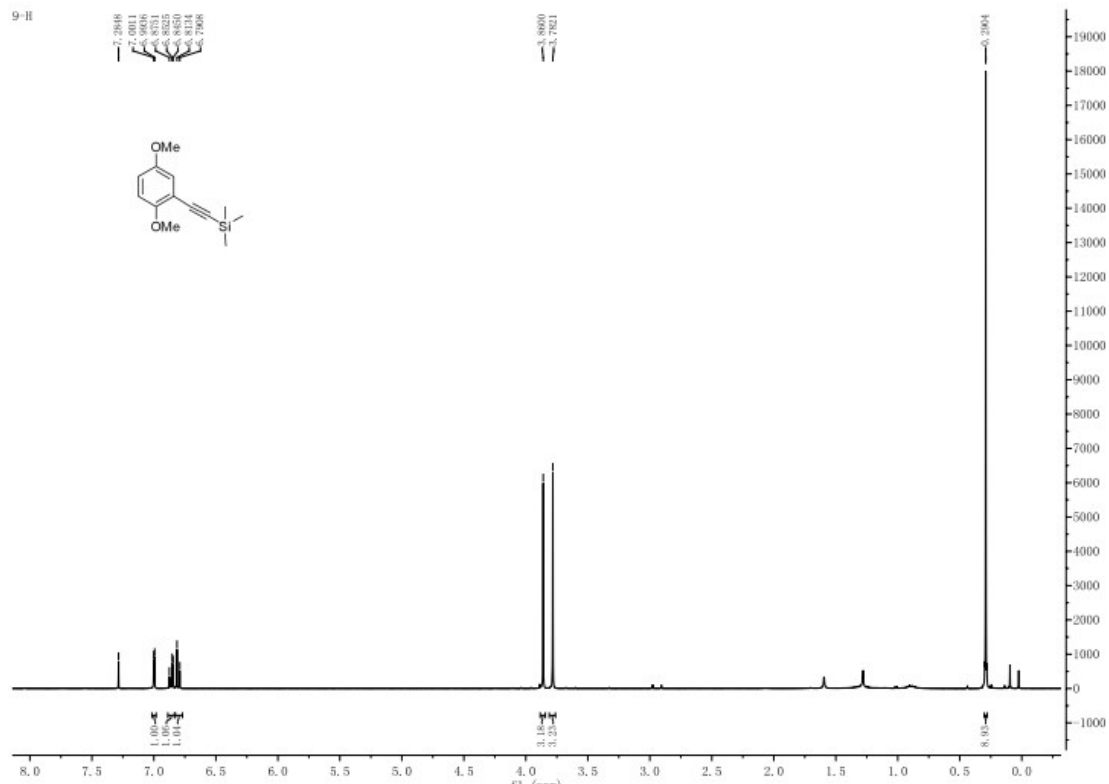

# <sup>1</sup>H NMR of **13**

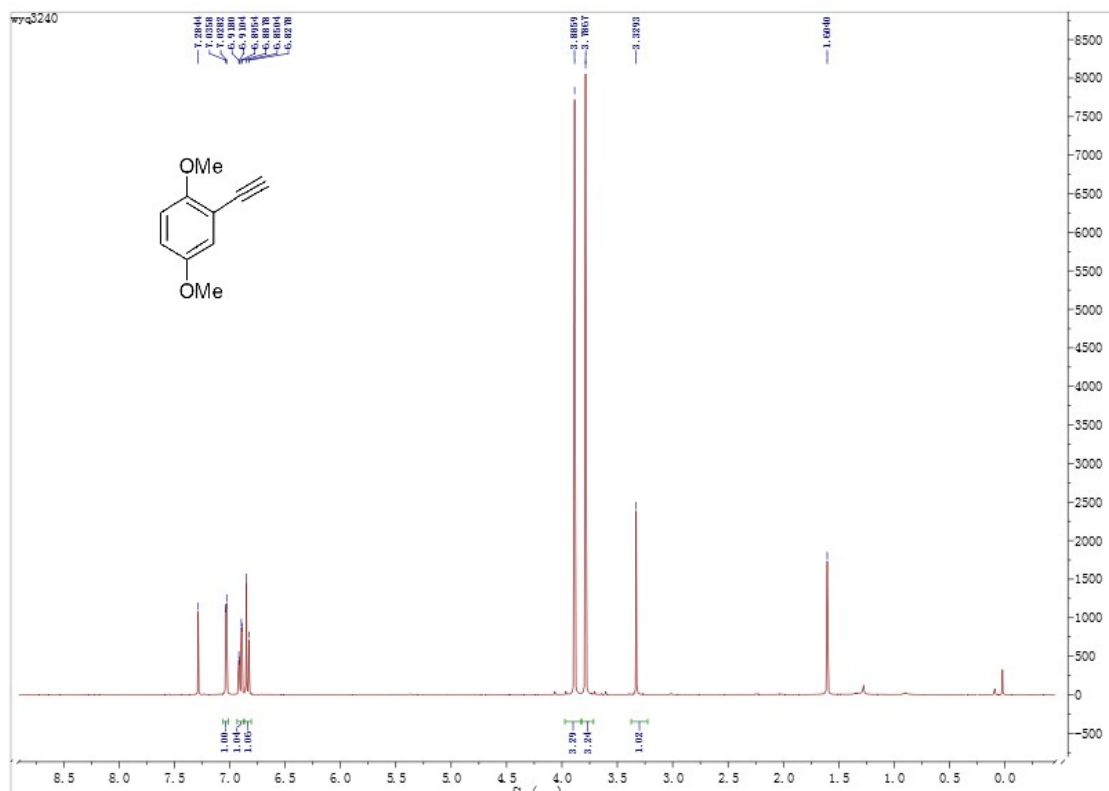

<sup>1</sup>H NMR of **15**

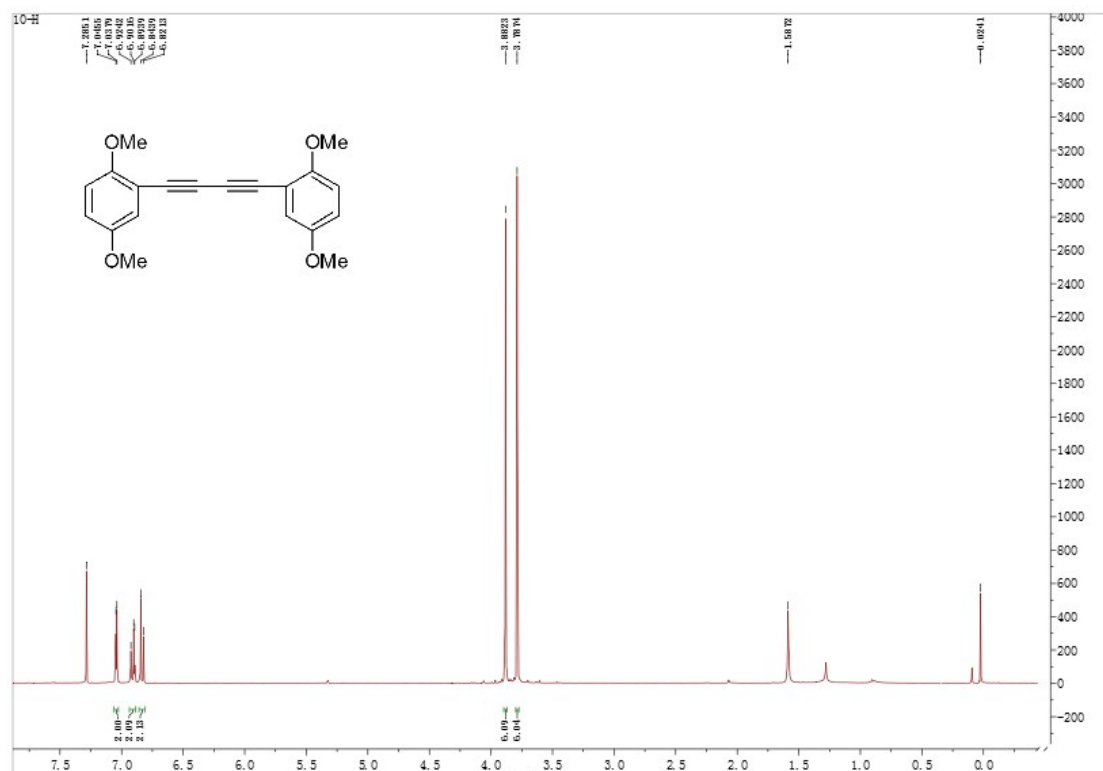

<sup>1</sup>H NMR of **1**

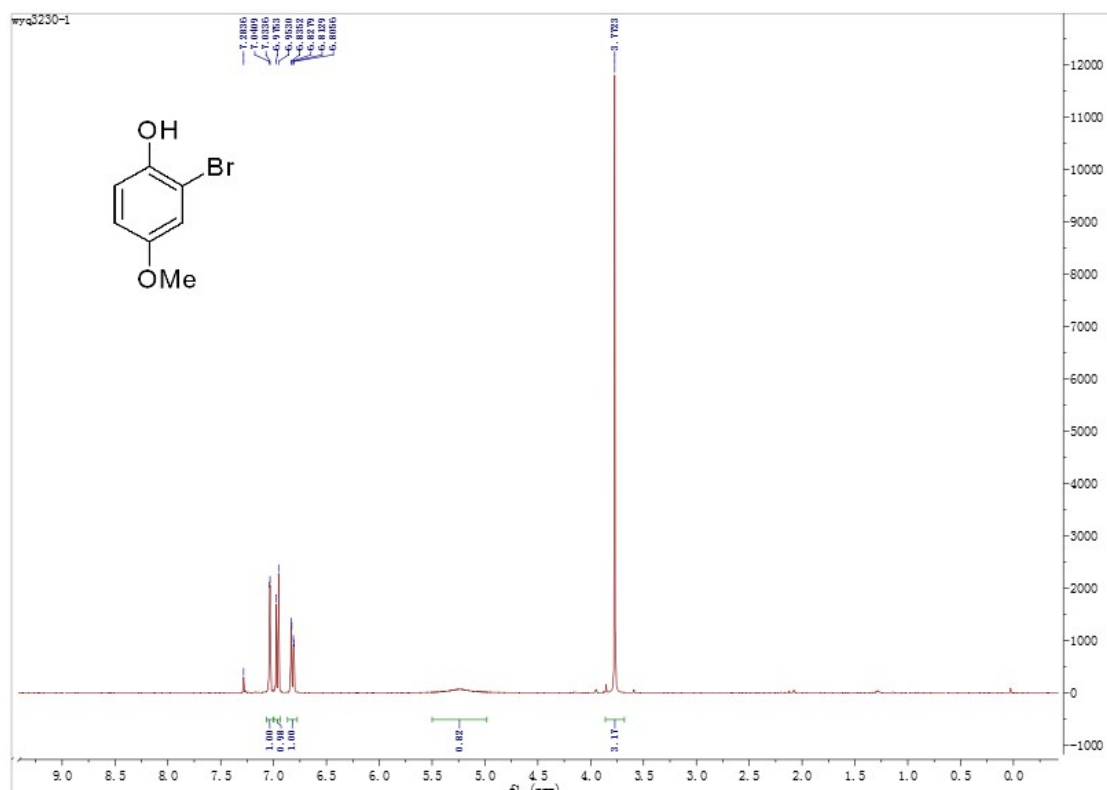

<sup>1</sup>H NMR of **16a**

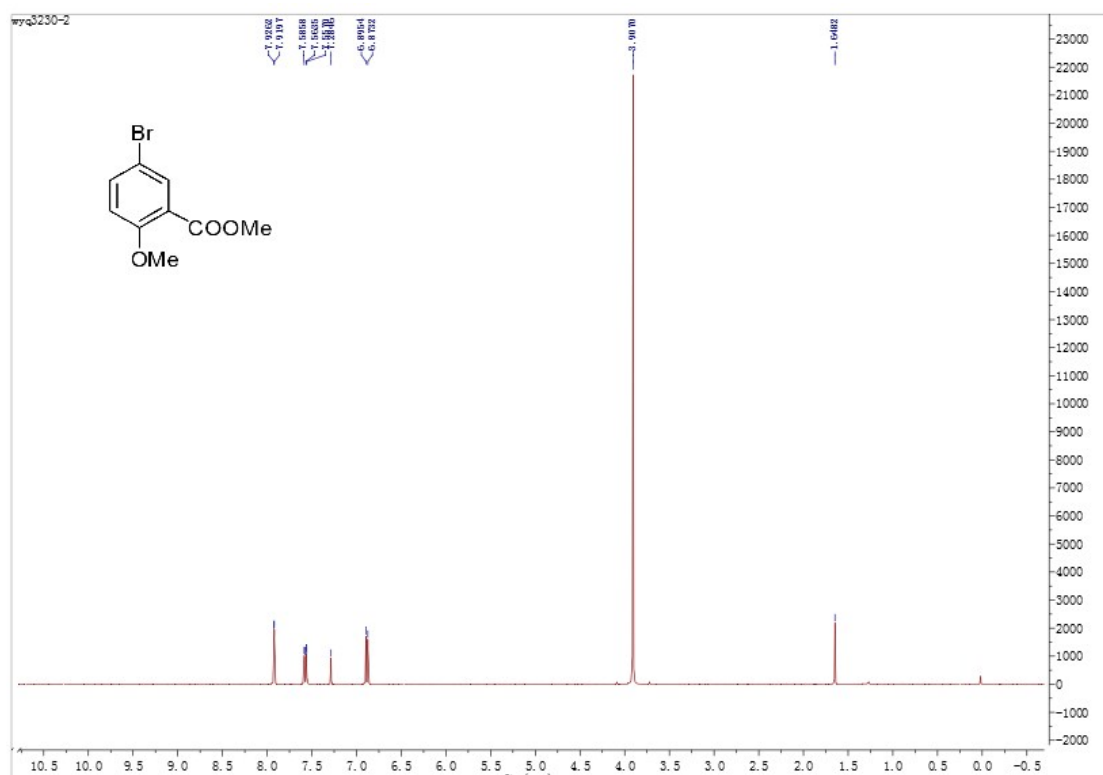

<sup>1</sup>H NMR of **16b**

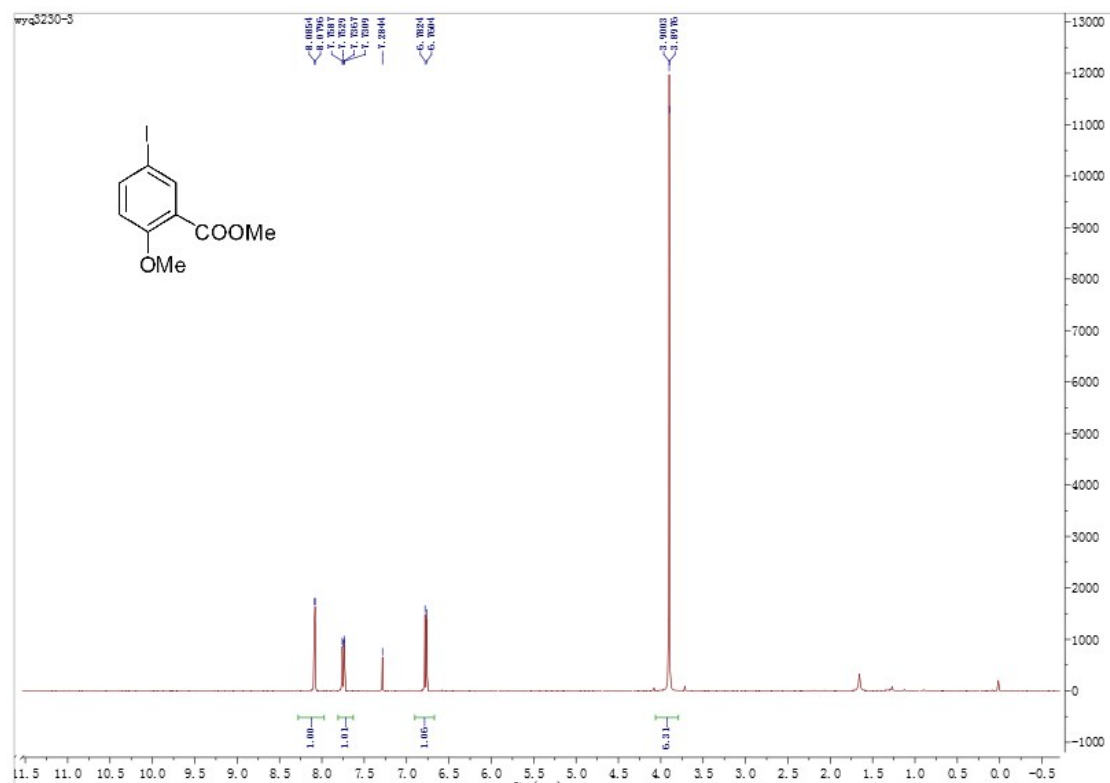

Supplement: c4ra15948a1.pdf [file c4ra15948a1.pdf]
